# Supplementary material for: IRF4 and STAT3 activities are associated with the imbalanced differentiation of T-cells in responses to inhalable particulate matters
Source: Respir Res. 2020 May 24;21:123. doi: 10.1186/s12931-020-01368-2 (PMC7245756; doi:10.1186/s12931-020-01368-2)
Supplement: Supplementary file 2 — Additional file 2: Sheet data S1. Gene list of the 18 co-expressed gene modules identified from the PBMC profiling study. Sheet data S2. KEGG pathways and GO biological processes significantly enriched in the co-expressed gene modules. Sheet data S3. Enrichment of the target genes of known transcription factors in the four modules strongly correlated with PM exposure. Sheet data S4. Enrichment of the binding motifs of known transcription factors in the poised cis-regulatory regions of the genes of the four modules strongly correlated with PM exposure. [file 12931_2020_1368_MOESM2_ESM.xlsx]

## Sheet: Execl Table S1
Excel Table S1. Gene list of the 18 co-expressed gene modules identified from the PBMC profiling study.
substanceBXH	geneSymbol	moduleColor	ModuleMembership	MMPvalue
ILMN_1811592	ARHGAP21	black	0.654042	4.23e-23
ILMN_2128639	PROSER2	black	0.632897	2.6e-21
ILMN_1787919	PARVB	black	0.776665	3.63e-37
ILMN_1674941	ANO6	black	0.675002	5.07e-25
ILMN_1808590	GUCY1A3	black	0.62929	5.09e-21
ILMN_1703142	2019-03-02	black	0.855554	3.35e-52
ILMN_1705686	NRGN	black	0.765773	1.42e-35
ILMN_2413527	VCL	black	0.781457	6.79e-38
ILMN_1738589	MGLL	black	0.713581	5.28e-29
ILMN_2370535	GAS2L1	black	0.653313	4.9e-23
ILMN_1707124	TFPI	black	0.706486	3.19e-28
ILMN_1690783	TREML1	black	0.902044	4.03e-66
ILMN_1713731	ALOX12	black	0.894272	2.34e-63
ILMN_1656624	C6orf123	black	0.68213	1.04e-25
ILMN_2089875	TNFSF4	black	0.601826	6.42e-19
ILMN_1668092	ESAM	black	0.885603	1.62e-60
ILMN_1705685	MEIS1	black	0.601019	7.35e-19
ILMN_2198239	HGD	black	0.640646	5.97e-22
ILMN_1691476	MYLK	black	0.751248	1.39e-33
ILMN_2392189	CTDSPL	black	0.884314	4.11e-60
ILMN_1742147	UBL4A	black	0.726171	1.89e-30
ILMN_1747650	BMP6	black	0.635726	1.53e-21
ILMN_2149292	TMEM40	black	0.754183	5.65e-34
ILMN_2069224	PVALB	black	0.693354	7.74e-27
ILMN_1783276	NEXN	black	0.712492	6.98e-29
ILMN_1761961	MCUR1	black	0.736349	1.12e-31
ILMN_1671686	DMTN	black	0.718827	1.35e-29
ILMN_1719599	SYTL4	black	0.711999	7.92e-29
ILMN_1752755	VWF	black	0.671131	1.18e-24
ILMN_1675617	NT5M	black	0.837003	5.86e-48
ILMN_1719286	CTSA	black	0.801847	3.25e-41
ILMN_1733324	ITGB3	black	0.766965	9.58e-36
ILMN_1715417	SELP	black	0.685918	4.37e-26
ILMN_1761844	ZCCHC17	black	0.666266	3.35e-24
ILMN_1805842	FHL1	black	0.760898	6.85e-35
ILMN_1657683	C1orf198	black	0.791584	1.7e-39
ILMN_1723277	MFAP3L	black	0.650506	8.61e-23
ILMN_1721888	ITGA2B	black	0.877162	5.81e-58
ILMN_2227011	ACSBG1	black	0.838751	2.46e-48
ILMN_1663519	SLC24A3	black	0.744835	9.53e-33
ILMN_1662795	CA2	black	0.633039	2.53e-21
ILMN_1778143	GRAP2	black	0.817716	4.46e-44
ILMN_1775380	SMOX	black	0.735836	1.29e-31
ILMN_1769575	JAM3	black	0.723579	3.81e-30
ILMN_2091920	PTCRA	black	0.722529	5.05e-30
ILMN_1671486	HOMER2	black	0.818926	2.63e-44
ILMN_1728197	CLDN5	black	0.710521	1.15e-28
ILMN_1705458	TRIM58	black	0.687308	3.18e-26
ILMN_1730487	CALD1	black	0.734963	1.65e-31
ILMN_1737992	CRAT	black	0.647959	1.43e-22
ILMN_1715991	SDPR	black	0.603098	5.18e-19
ILMN_1784948	SPOCD1	black	0.657507	2.08e-23
ILMN_1684771	PGRMC1	black	0.735457	1.44e-31
ILMN_1767037	PF4	black	0.725423	2.32e-30
ILMN_1717163	F13A1	black	0.850274	6.18e-51
ILMN_1699022	ENDOD1	black	0.785614	1.53e-38
ILMN_1717793	C19orf33	black	0.651554	6.98e-23
ILMN_1757237	ASAP2	black	0.726998	1.51e-30
ILMN_1745103	CLEC1B	black	0.822769	4.77e-45
ILMN_2389876	TGFB1I1	black	0.666949	2.89e-24
ILMN_1672605	MTURN	black	0.616923	4.77e-20
ILMN_1656940	ABLIM3	black	0.845476	7.94e-50
ILMN_2393712	CTTN	black	0.825057	1.69e-45
ILMN_2412294	GNB5	black	0.697735	2.72e-27
ILMN_3237923	BEND2	black	0.720813	7.98e-30
ILMN_1702447	IGF2BP2	black	0.710766	1.08e-28
ILMN_1671928	PROS1	black	0.812629	3.95e-43
ILMN_1693269	GNG8	black	0.602035	6.2e-19
ILMN_1803180	PRDX6	black	0.715558	3.17e-29
ILMN_2360710	TPM1	black	0.780934	8.17e-38
ILMN_1775373	CMTM5	black	0.884755	2.99e-60
ILMN_1708580	PDZK1IP1	black	0.65979	1.3e-23
ILMN_1753575	GP1BA	black	0.728161	1.1e-30
ILMN_1714364	PTK2	black	0.624439	1.24e-20
ILMN_1728742	FAXDC2	black	0.928649	1.03e-77
ILMN_2215640	TUBA3D	black	0.666144	3.44e-24
ILMN_2379560	CDC14B	black	0.78392	2.82e-38
ILMN_1781536	FAH	black	0.659451	1.4e-23
ILMN_1810797	WASF3	black	0.732702	3.13e-31
ILMN_1787567	TSC22D1	black	0.631631	3.3e-21
ILMN_1710354	KIFC3	black	0.714043	4.69e-29
ILMN_1784203	ACRBP	black	0.876919	6.84e-58
ILMN_1655867	HRASLS	black	0.682773	8.96e-26
ILMN_1700541	FBLN1	black	0.74489	9.38e-33
ILMN_1768099	SCGB1C1	black	0.641247	5.31e-22
ILMN_3247023	CASC15	black	0.616713	4.95e-20
ILMN_1745522	PF4V1	black	0.602054	6.18e-19
ILMN_1808238	RBPMS2	black	0.615588	6.03e-20
ILMN_1792455	TMEM158	black	0.787171	8.68e-39
ILMN_1729487	GMPR	black	0.791047	2.07e-39
ILMN_1676973	CABP5	black	0.777415	2.8e-37
ILMN_1675062	MYL9	black	0.763055	3.43e-35
ILMN_1729453	TSPAN9	black	0.869927	6.42e-56
ILMN_1658702	HIST1H2BJ	black	0.708942	1.72e-28
ILMN_1766675	CDH6	black	0.718403	1.51e-29
ILMN_1742548	GFI1B	black	0.748208	3.49e-33
ILMN_1693428	TNNC2	black	0.770596	2.87e-36
ILMN_2370091	NGFRAP1	black	0.729969	6.68e-31
ILMN_1701558	MAP1A	black	0.659071	1.51e-23
ILMN_1679838	WBP5	black	0.667923	2.35e-24
ILMN_1810836	PDE5A	black	0.799854	7.14e-41
ILMN_1788955	PDLIM1	black	0.826231	9.88e-46
ILMN_1760688	SAMD14	black	0.771007	2.5e-36
ILMN_1679520	AGPAT1	black	0.663009	6.65e-24
ILMN_1680928	DNM3	black	0.676905	3.33e-25
ILMN_1787526	C2orf88	black	0.830049	1.67e-46
ILMN_2090004	AQP10	black	0.631188	3.58e-21
ILMN_2311166	ITGB5	black	0.807653	3.13e-42
ILMN_1766182	GNAZ	black	0.686857	3.53e-26
ILMN_1686373	C15orf26	black	0.699194	1.91e-27
ILMN_1783158	LY6G6F	black	0.796526	2.6e-40
ILMN_1782618	C9orf16	black	0.582879	4.45e-36
ILMN_1687825	CD226	black	0.542306	8.89e-15
ILMN_1757440	FAM69B	black	0.590386	4.95e-18
ILMN_2366330	FERMT3	black	0.52064	4.82e-14
ILMN_1756849	HIST1H2AE	black	0.542408	7.08e-15
ILMN_1688666	HIST1H2BH	black	0.554458	5.95e-16
ILMN_1788489	HIST1H3F	black	0.546554	2.86e-15
ILMN_1749368	HIST1H3H	black	0.584449	9.98e-18
ILMN_1733937	MMD	black	0.56828	3.08e-16
ILMN_1781966	OSBP2	black	0.554652	9.38e-16
ILMN_1665100	PTGS1	black	0.588018	5.04e-18
ILMN_1837428	RAB27B	black	0.479813	6.94e-12
ILMN_1699472	ST3GAL3	black	0.547478	1.66e-15
ILMN_1749403	TSPAN33	black	0.561206	1.83e-17
ILMN_1759117	XK	black	0.549465	5.48e-15
ILMN_1802888	ZNF185	black	0.597008	2.89e-19
ILMN_1710268	ZNF385D	black	0.586593	5.91e-18
ILMN_1792138	UQCRH	black	-0.0069561	0.926576
ILMN_1657790	SRSF11	black	0.300804	4.51e-05
ILMN_1733615	MTF2	black	0.115921	0.123347
ILMN_2150284	RNPC3	black	-0.206285	0.00573481
ILMN_1708164	EIF3A	black	0.0614774	0.414956
ILMN_3227529	RPS13	black	0.113541	0.13129
ILMN_2363065	RTN3	black	-0.345605	2.3e-06
ILMN_2181241	RPL23AP64	black	-0.0548455	0.467151
ILMN_1655710	RPS25	black	0.0458356	0.543496
ILMN_1730082	RPUSD4	black	0.0467523	0.535457
ILMN_2080637	ZBTB44	black	0.339526	3.55e-06
ILMN_3289352	RPL6	black	-0.0382059	0.612629
ILMN_3205271	HMGB1	black	0.0695813	0.356054
ILMN_1756162	EXOSC8	black	0.573927	5.55e-17
ILMN_1720285	ESD	black	0.549581	1.95e-15
ILMN_1726308	ST13P4	black	-0.06167	0.413493
ILMN_1746784	SLAIN1	black	-0.114996	0.126388
ILMN_3266944	RPS29	black	0.0858816	0.254354
ILMN_1803788	LGALS3	black	0.19128	0.0105375
blue
substanceBXH	geneSymbol	moduleColor	ModuleMembership	MMPvalue
ILMN_1659437	TXNDC17	blue	0.823121	4.07e-45
ILMN_1733998	DHRS9	blue	0.861086	1.39e-53
ILMN_3308936	MIR223	blue	0.912154	4.36e-70
ILMN_2365595	GMPR2	blue	0.877822	3.73e-58
ILMN_1692390	CCNT1	blue	-0.81827	3.5e-44
ILMN_1687410	OSBPL11	blue	0.841611	5.83e-49
ILMN_1712027	RSBN1L	blue	0.822917	4.46e-45
ILMN_2041190	F2RL1	blue	0.902442	2.87e-66
ILMN_1727098	PPP1R16B	blue	-0.842967	2.91e-49
ILMN_1675191	GAPT	blue	0.865393	1.06e-54
ILMN_1761721	VPS35	blue	0.893866	3.23e-63
ILMN_1781416	FRAT1	blue	0.885001	2.51e-60
ILMN_1714083	KLHL8	blue	0.830459	1.38e-46
ILMN_1691760	FAM45A	blue	0.848301	1.78e-50
ILMN_3304435	FAM133CP	blue	-0.888532	1.89e-61
ILMN_1809695	CAMK2G	blue	0.865573	9.52e-55
ILMN_1745807	TMEM62	blue	-0.835766	1.08e-47
ILMN_1776435	GPRIN3	blue	-0.831813	7.26e-47
ILMN_1743570	CEACAM3	blue	0.86943	8.77e-56
ILMN_3241870	FRMD8	blue	0.811603	6.08e-43
ILMN_1666453	STK3	blue	0.867729	2.53e-55
ILMN_1680347	ZNF317	blue	-0.858864	5.08e-53
ILMN_1788223	RSPH3	blue	0.875251	2.07e-57
ILMN_1669555	SUPT20H	blue	0.854407	6.38e-52
ILMN_2098743	ACOT13	blue	0.850214	6.38e-51
ILMN_1742569	MTPAP	blue	-0.810397	1.01e-42
ILMN_1664525	P2RY13	blue	0.93818	5.2e-83
ILMN_1766094	MOSPD2	blue	0.827519	5.46e-46
ILMN_2161832	VPS37A	blue	0.809432	1.5e-42
ILMN_1737426	PCMTD1	blue	0.853403	1.11e-51
ILMN_1813256	CRIPT	blue	0.835842	1.04e-47
ILMN_1744147	CEBPZ	blue	-0.816783	6.68e-44
ILMN_1703471	ATF6	blue	0.898443	8.2e-65
ILMN_2235283	MAPK1	blue	0.899196	4.41e-65
ILMN_1749892	EGLN1	blue	0.92527	5.19e-76
ILMN_1713892	SMIM14	blue	0.83965	1.57e-48
ILMN_1716815	CEACAM1	blue	0.858194	7.47e-53
ILMN_1801307	TNFSF10	blue	0.834162	2.35e-47
ILMN_1721876	TIMP2	blue	0.880206	7.34e-59
ILMN_1814296	TRPM6	blue	0.86472	1.6e-54
ILMN_1779886	TBC1D14	blue	0.874897	2.61e-57
ILMN_1725707	ATG16L1	blue	-0.861101	1.38e-53
ILMN_1698605	TMEM43	blue	0.900588	1.38e-65
ILMN_1751234	C1GALT1C1	blue	0.922759	8.49e-75
ILMN_1712577	FAM174A	blue	0.888429	2.04e-61
ILMN_1811616	EEPD1	blue	0.814373	1.88e-43
ILMN_1763322	CCR3	blue	0.844542	1.29e-49
ILMN_1653292	PFKFB4	blue	0.895591	8.25e-64
ILMN_1743049	PWP1	blue	-0.769922	3.59e-36
ILMN_1718982	BEST1	blue	0.868644	1.43e-55
ILMN_2290118	MEGF9	blue	0.949785	9.84e-91
ILMN_1666924	PINK1	blue	0.826861	7.39e-46
ILMN_1787808	CEP63	blue	0.936162	8.03e-82
ILMN_1658706	ST6GALNAC2	blue	0.880385	6.49e-59
ILMN_1726783	RNASEH1	blue	-0.883643	6.63e-60
ILMN_2403906	ARFIP1	blue	0.908555	1.27e-68
ILMN_1655191	CASZ1	blue	-0.808729	2.01e-42
ILMN_1656934	REPS2	blue	0.930595	9.83e-79
ILMN_1652490	MANSC1	blue	0.925241	5.36e-76
ILMN_1792672	POLR2D	blue	-0.795148	4.41e-40
ILMN_2229922	KIAA1551	blue	0.86122	1.29e-53
ILMN_1659544	STX3	blue	0.945205	1.74e-87
ILMN_1752117	TMEM55A	blue	0.835925	9.96e-48
ILMN_1745172	ILF2	blue	-0.808074	2.63e-42
ILMN_1673604	YIPF3	blue	0.826099	1.05e-45
ILMN_2044293	KBTBD7	blue	0.83952	1.68e-48
ILMN_1763147	NDUFB6	blue	0.842639	3.45e-49
ILMN_1684647	ILKAP	blue	-0.852048	2.35e-51
ILMN_1756220	DDX18	blue	-0.797641	1.69e-40
ILMN_1716259	PROK1	blue	0.801708	3.44e-41
ILMN_1685005	TNFRSF1A	blue	0.822276	5.94e-45
ILMN_1781560	ST3GAL6	blue	0.840919	8.28e-49
ILMN_1664369	DHTKD1	blue	0.836798	6.49e-48
ILMN_1731720	PDRG1	blue	-0.813905	2.3e-43
ILMN_1751803	LSM10	blue	0.753272	7.48e-34
ILMN_1740298	SIGLEC5	blue	0.862879	4.82e-54
ILMN_1731224	PARP9	blue	0.836717	6.75e-48
ILMN_1796976	NLRC4	blue	0.814088	2.13e-43
ILMN_1660125	SFMBT2	blue	-0.838081	3.44e-48
ILMN_1668417	WIPF1	blue	0.858726	5.5e-53
ILMN_1670028	LPIN2	blue	0.793963	6.92e-40
ILMN_1755234	SSH3	blue	0.778577	1.87e-37
ILMN_1724236	FUT7	blue	0.837622	4.32e-48
ILMN_3240685	INO80D	blue	-0.884797	2.9e-60
ILMN_1782444	YIPF4	blue	0.834886	1.65e-47
ILMN_1676010	SP1	blue	0.833845	2.74e-47
ILMN_1669015	XPNPEP1	blue	-0.869174	1.03e-55
ILMN_2124386	RGL2	blue	0.856891	1.57e-52
ILMN_1750158	ACOX1	blue	0.903584	1.07e-66
ILMN_3251728	MTMR10	blue	0.821819	7.29e-45
ILMN_1709334	TM9SF1	blue	0.881377	3.26e-59
ILMN_2202915	FAR2	blue	0.930288	1.43e-78
ILMN_1731048	TLR1	blue	0.85923	4.11e-53
ILMN_2181968	CBL	blue	0.813552	2.67e-43
ILMN_1803560	LAT2	blue	0.88952	9.05e-62
ILMN_1764456	TECPR2	blue	0.825851	1.18e-45
ILMN_2348487	EMR3	blue	0.921374	3.81e-74
ILMN_1712095	FOXO4	blue	0.841804	5.28e-49
ILMN_1704972	TRIM5	blue	0.791716	1.61e-39
ILMN_2384591	HN1	blue	0.913295	1.45e-70
ILMN_1803819	IQGAP1	blue	0.841062	7.7e-49
ILMN_1759184	C19orf48	blue	-0.893216	5.36e-63
ILMN_1698996	SLC19A1	blue	0.832388	5.52e-47
ILMN_1688953	ARHGAP19	blue	0.814913	1.49e-43
ILMN_1763036	CLCN6	blue	-0.836173	8.82e-48
ILMN_1665859	RAB27A	blue	0.886895	6.34e-61
ILMN_1653498	IGSF6	blue	0.768862	5.11e-36
ILMN_1717154	AQR	blue	-0.826424	9.04e-46
ILMN_2055477	EXOSC7	blue	-0.852827	1.53e-51
ILMN_1810514	SLC25A44	blue	0.781279	7.23e-38
ILMN_2220739	TMCO3	blue	0.846156	5.56e-50
ILMN_2398865	VPS13C	blue	-0.780008	1.13e-37
ILMN_1709204	CLEC4A	blue	0.859461	3.59e-53
ILMN_1788931	DOCK8	blue	0.824707	1.98e-45
ILMN_3235326	SNHG17	blue	-0.816687	6.97e-44
ILMN_1728724	IL17RA	blue	0.842582	3.55e-49
ILMN_1741585	SFMBT1	blue	-0.797193	2.01e-40
ILMN_1655414	TNFSF14	blue	0.765174	1.72e-35
ILMN_1796235	CIRH1A	blue	-0.903657	1e-66
ILMN_1746012	MBD6	blue	0.803625	1.6e-41
ILMN_1658830	WBP1L	blue	0.828231	3.92e-46
ILMN_2324994	IKBIP	blue	0.804043	1.35e-41
ILMN_1668535	JOSD1	blue	-0.802089	2.96e-41
ILMN_1801776	PSG9	blue	0.790426	2.61e-39
ILMN_1758337	ZNF213	blue	0.765477	1.56e-35
ILMN_1675756	KCNJ15	blue	0.930465	1.15e-78
ILMN_1678605	CDC123	blue	0.853924	8.34e-52
ILMN_2148668	RCBTB2	blue	0.863523	3.28e-54
ILMN_1661196	CSF2RA	blue	0.863924	2.58e-54
ILMN_1722158	CASP5	blue	0.792649	1.14e-39
ILMN_1794875	AGPAT9	blue	0.75469	4.83e-34
ILMN_1724753	NIN	blue	0.832774	4.58e-47
ILMN_1803984	MAK	blue	0.820168	1.52e-44
ILMN_1767365	PAK1	blue	0.89799	1.19e-64
ILMN_1729319	USP7	blue	-0.728944	8.86e-31
ILMN_1731745	NINJ2	blue	0.808115	2.59e-42
ILMN_1771003	HAUS4	blue	0.797954	1.5e-40
ILMN_1743755	C6orf226	blue	-0.859509	3.5e-53
ILMN_1791545	KRT23	blue	0.853247	1.21e-51
ILMN_2283325	WLS	blue	0.825619	1.31e-45
ILMN_1815719	PLCG2	blue	0.806647	4.72e-42
ILMN_1711023	CDK5RAP1	blue	-0.881748	2.52e-59
ILMN_1752478	DHRS3	blue	-0.835717	1.1e-47
ILMN_1780773	LINC00938	blue	-0.825022	1.72e-45
ILMN_1674265	AVIL	blue	0.802527	2.48e-41
ILMN_1723235	DUS3L	blue	-0.830206	1.55e-46
ILMN_3306730	RBM47	blue	0.93903	1.6e-83
ILMN_1814859	DDX47	blue	-0.788917	4.57e-39
ILMN_2376833	ZNF200	blue	0.826625	8.24e-46
ILMN_1678087	MAP3K4	blue	-0.868005	2.14e-55
ILMN_2100689	MAP2K4	blue	0.868411	1.66e-55
ILMN_1675186	ME2	blue	0.815073	1.4e-43
ILMN_1686152	GGA2	blue	-0.89744	1.86e-64
ILMN_1677085	RGS19	blue	0.839404	1.78e-48
ILMN_2087303	XKR8	blue	0.833091	3.94e-47
ILMN_1656413	ZMPSTE24	blue	0.800137	6.39e-41
ILMN_1719344	NRBF2	blue	0.936031	9.56e-82
ILMN_1687592	WWC3	blue	0.837868	3.82e-48
ILMN_1750961	TM6SF1	blue	0.94096	1.03e-84
ILMN_1781231	SLC25A38	blue	-0.801766	3.36e-41
ILMN_3225534	RNF216P1	blue	0.782596	4.53e-38
ILMN_1782070	NPL	blue	0.934324	9e-81
ILMN_3242011	MOB1A	blue	0.875593	1.65e-57
ILMN_1688240	PHOSPHO1	blue	0.76329	3.17e-35
ILMN_3235185	SNRNP200	blue	-0.799931	6.93e-41
ILMN_2349600	BRD8	blue	0.782478	4.72e-38
ILMN_1782459	OSBPL8	blue	0.780955	8.11e-38
ILMN_1697348	WBSCR22	blue	-0.875299	2.01e-57
ILMN_2395974	PRDX3	blue	0.814677	1.65e-43
ILMN_2261076	NEDD9	blue	0.810828	8.41e-43
ILMN_1667476	LTBR	blue	0.776943	3.3e-37
ILMN_1748819	MRPL22	blue	-0.860449	2.02e-53
ILMN_1773964	H1FX	blue	-0.732518	3.29e-31
ILMN_1696394	IL6R	blue	0.851347	3.45e-51
ILMN_1781819	PAPSS1	blue	0.7026	8.34e-28
ILMN_1733579	EVI2A	blue	0.831556	8.2e-47
ILMN_3263290	LOC100129697	blue	0.758723	1.37e-34
ILMN_1747598	PPP1R11	blue	0.799091	9.62e-41
ILMN_2094061	IMPA2	blue	0.832192	6.06e-47
ILMN_1789243	VPS33B	blue	-0.804678	1.05e-41
ILMN_1749521	SLC35E3	blue	0.819103	2.43e-44
ILMN_1797534	RIOK1	blue	-0.784705	2.12e-38
ILMN_1792518	STX7	blue	0.840588	9.8e-49
ILMN_1653367	TAF12	blue	0.879986	8.54e-59
ILMN_1657509	TSEN54	blue	-0.752712	8.88e-34
ILMN_1713189	KANSL2	blue	-0.72394	3.46e-30
ILMN_1679428	CHIC2	blue	0.817681	4.52e-44
ILMN_1693290	METTL16	blue	-0.771345	2.23e-36
ILMN_3251451	MED31	blue	0.771909	1.84e-36
ILMN_1804854	CTNNA1	blue	0.790052	3e-39
ILMN_3251545	CHMP5	blue	0.759665	1.01e-34
ILMN_2083946	TGFA	blue	0.86397	2.51e-54
ILMN_1715908	NCAPH2	blue	-0.790623	2.43e-39
ILMN_1733443	SULT1B1	blue	0.813399	2.85e-43
ILMN_3248263	CCDC93	blue	-0.854032	7.85e-52
ILMN_1758672	FAM107B	blue	-0.682047	1.06e-25
ILMN_1700762	PBX4	blue	-0.786453	1.13e-38
ILMN_1676759	DDX27	blue	-0.833632	3.03e-47
ILMN_1717219	FAM220A	blue	0.755985	3.23e-34
ILMN_1740864	TREML2	blue	0.858029	8.21e-53
ILMN_1780058	DEGS1	blue	0.756929	2.4e-34
ILMN_3236556	UBXN2B	blue	0.9331	4.33e-80
ILMN_2074748	HAL	blue	0.848119	1.97e-50
ILMN_1734138	TATDN2	blue	-0.776613	3.7e-37
ILMN_1793894	ANAPC13	blue	0.764381	2.23e-35
ILMN_1813669	ANKS1A	blue	0.795964	3.23e-40
ILMN_1725071	CCDC12	blue	-0.825444	1.42e-45
ILMN_1745262	REM2	blue	0.812612	3.98e-43
ILMN_1803739	RPGRIP1	blue	0.81387	2.33e-43
ILMN_1682738	SMAD3	blue	-0.708735	1.81e-28
ILMN_1676763	PIPSL	blue	0.678078	2.57e-25
ILMN_1675956	LYST	blue	0.881497	3e-59
ILMN_1673111	TSEN34	blue	0.847043	3.48e-50
ILMN_1702817	B3GNTL1	blue	0.752022	1.1e-33
ILMN_1697286	SF3A1	blue	0.796899	2.25e-40
ILMN_1696466	ROPN1L	blue	0.882053	2.03e-59
ILMN_1711516	ATP6V1A	blue	0.855475	3.5e-52
ILMN_2393296	GK	blue	0.864965	1.38e-54
ILMN_1803464	PHTF1	blue	0.802919	2.12e-41
ILMN_1706304	AGO4	blue	0.823336	3.69e-45
ILMN_1811997	RNF115	blue	-0.807563	3.25e-42
ILMN_1685580	CBLB	blue	-0.7951	4.49e-40
ILMN_1695797	NCOA6	blue	0.758841	1.32e-34
ILMN_1689456	ZBTB20	blue	-0.743864	1.27e-32
ILMN_2323774	RPAIN	blue	-0.836422	7.81e-48
ILMN_1796738	SPAST	blue	0.796608	2.52e-40
ILMN_1657892	TLR8	blue	0.795746	3.51e-40
ILMN_1662524	CXCR1	blue	0.830808	1.17e-46
ILMN_1734895	SFT2D1	blue	0.803912	1.43e-41
ILMN_1671427	FBXW4	blue	-0.81592	9.7e-44
ILMN_1774828	VEZT	blue	-0.706681	3.04e-28
ILMN_1660462	MCOLN2	blue	-0.760849	6.95e-35
ILMN_1678833	CCR1	blue	0.711002	1.02e-28
ILMN_1686805	CRK	blue	0.786673	1.04e-38
ILMN_1798827	SRBD1	blue	0.800011	6.71e-41
ILMN_2087646	HLX	blue	0.791847	1.54e-39
ILMN_1715864	NHS	blue	0.80925	1.62e-42
ILMN_1760741	NDUFA9	blue	-0.806148	5.79e-42
ILMN_1713978	SDF2	blue	0.874729	2.92e-57
ILMN_3229033	LOC732360	blue	-0.746185	6.39e-33
ILMN_1791253	FBXL13	blue	0.8516	3e-51
ILMN_1689518	PECAM1	blue	0.88645	8.78e-61
ILMN_1720850	BAZ2B	blue	0.834531	1.96e-47
ILMN_3243351	LOC646214	blue	0.645347	2.39e-22
ILMN_1797301	FAM212B	blue	0.701599	1.07e-27
ILMN_1767809	DNAJC25-GNG10	blue	0.798901	1.04e-40
ILMN_1780671	PLEKHG3	blue	0.73984	4.11e-32
ILMN_3294126	RPL39	blue	-0.735351	1.48e-31
ILMN_1670322	FCHO2	blue	0.744765	9.73e-33
ILMN_2378100	FBXL5	blue	0.87851	2.34e-58
ILMN_1657455	CEACAM4	blue	0.752981	8.18e-34
ILMN_1756942	SP3	blue	0.791644	1.66e-39
ILMN_2339748	RNF13	blue	0.896887	2.91e-64
ILMN_1682165	NT5C2	blue	0.78033	1.01e-37
ILMN_1651819	GALNT11	blue	-0.712708	6.61e-29
ILMN_1657129	SKAP2	blue	0.828087	4.19e-46
ILMN_1662865	CPPED1	blue	0.797745	1.62e-40
ILMN_1797107	SCLT1	blue	0.768692	5.41e-36
ILMN_1796210	PPRC1	blue	-0.791019	2.1e-39
ILMN_1804895	LSMEM1	blue	0.782923	4.03e-38
ILMN_1677997	MAZ	blue	0.756505	2.74e-34
ILMN_2405602	OSBPL1A	blue	0.734149	2.08e-31
ILMN_1806293	LIN7A	blue	0.770233	3.24e-36
ILMN_1676895	BTNL8	blue	0.806029	6.07e-42
ILMN_1696187	PYGL	blue	0.874301	3.87e-57
ILMN_1813028	CBX5	blue	-0.744826	9.56e-33
ILMN_1673282	LAMP2	blue	0.897954	1.22e-64
ILMN_1654099	LRIG2	blue	-0.789712	3.41e-39
ILMN_1765644	COMMD8	blue	0.780279	1.03e-37
ILMN_1755843	SLC26A8	blue	0.796396	2.73e-40
ILMN_1779399	SNRPA	blue	-0.750918	1.54e-33
ILMN_1799106	2019-03-01	blue	0.797045	2.13e-40
ILMN_1694810	PANX2	blue	0.836064	9.31e-48
ILMN_1801767	ABHD3	blue	0.893461	4.43e-63
ILMN_1691117	DNTTIP1	blue	0.81242	4.31e-43
ILMN_2150352	CBWD5	blue	0.692198	1.02e-26
ILMN_1707631	MED10	blue	-0.793549	8.09e-40
ILMN_1784031	TIMM44	blue	-0.707188	2.67e-28
ILMN_1785852	NABP1	blue	0.823355	3.66e-45
ILMN_1766916	RPAP3	blue	0.732037	3.76e-31
ILMN_1721116	USP10	blue	0.70542	4.16e-28
ILMN_2129015	AFF1	blue	0.682589	9.34e-26
ILMN_1740875	FPR2	blue	0.838843	2.35e-48
ILMN_2173451	GPI	blue	-0.788434	5.46e-39
ILMN_1773716	MRPL9	blue	-0.781784	6.04e-38
ILMN_1777998	ARHGAP25	blue	0.600163	8.48e-19
ILMN_1701403	HIP1	blue	0.789469	3.73e-39
ILMN_1661002	RFWD2	blue	0.805451	7.68e-42
ILMN_1670948	TSR2	blue	-0.854098	7.57e-52
ILMN_1783546	CARKD	blue	-0.719439	1.15e-29
ILMN_2186319	TSPAN2	blue	0.612393	1.06e-19
ILMN_1726842	TYW3	blue	-0.699108	1.95e-27
ILMN_1700276	JKAMP	blue	0.723628	3.76e-30
ILMN_1717197	CD3G	blue	-0.756945	2.39e-34
ILMN_1764609	PWWP2B	blue	-0.606658	2.83e-19
ILMN_1651705	CAT	blue	0.694231	6.29e-27
ILMN_1706342	ZNF746	blue	0.739381	4.69e-32
ILMN_1815115	CYC1	blue	-0.780547	9.36e-38
ILMN_2170949	SNX10	blue	0.809916	1.23e-42
ILMN_1788002	MAPK14	blue	0.710349	1.21e-28
ILMN_1795715	DPYD	blue	0.790393	2.64e-39
ILMN_1694548	ANXA3	blue	0.743047	1.61e-32
ILMN_1731714	CREB5	blue	0.877916	3.5e-58
ILMN_1810922	PCNT	blue	-0.73327	2.67e-31
ILMN_3245973	MSL1	blue	0.859253	4.06e-53
ILMN_1655206	ZBTB34	blue	0.774444	7.8e-37
ILMN_1663422	RGL4	blue	0.732294	3.5e-31
ILMN_1790973	CDS2	blue	0.787418	7.93e-39
ILMN_1704876	USP38	blue	0.683964	6.84e-26
ILMN_2336982	NPTN	blue	0.717566	1.88e-29
ILMN_1698487	SDHD	blue	0.709872	1.36e-28
ILMN_1802257	PCTP	blue	0.739539	4.48e-32
ILMN_1684594	USP24	blue	-0.766945	9.64e-36
ILMN_1869897	NEK7	blue	0.715439	3.27e-29
ILMN_3242603	GTF2H2B	blue	0.6979	2.62e-27
ILMN_1787366	ZNF335	blue	-0.66116	9.79e-24
ILMN_3245822	SCARNA17	blue	-0.764773	1.96e-35
ILMN_1721669	IDH3B	blue	-0.690225	1.62e-26
ILMN_2241953	PILRA	blue	0.809038	1.77e-42
ILMN_1684034	STAT5B	blue	0.742808	1.73e-32
ILMN_1677693	HCAR3	blue	0.705874	3.71e-28
ILMN_1772692	DICER1	blue	0.652199	6.13e-23
ILMN_1784871	FASN	blue	-0.747721	4.04e-33
ILMN_3236945	PTPMT1	blue	-0.738473	6.09e-32
ILMN_1724544	PPP4R1	blue	0.854177	7.25e-52
ILMN_1785765	TM9SF2	blue	0.65287	5.36e-23
ILMN_1652825	IL10RA	blue	-0.647411	1.59e-22
ILMN_1693192	PI3	blue	0.626659	8.26e-21
ILMN_2155228	CRLF3	blue	0.696976	3.27e-27
ILMN_1654609	EPB41L4A-AS1	blue	-0.812973	3.41e-43
ILMN_2052163	YIPF1	blue	0.768596	5.59e-36
ILMN_2386008	MPZL1	blue	0.79081	2.26e-39
ILMN_1666444	RBMS1	blue	0.638987	8.21e-22
ILMN_1715863	MLKL	blue	0.752074	1.08e-33
ILMN_1774890	LAS1L	blue	-0.787223	8.51e-39
ILMN_1812618	ARAP3	blue	0.695072	5.15e-27
ILMN_1782273	N4BP2	blue	-0.606841	2.75e-19
ILMN_1733276	CYSLTR1	blue	0.62391	1.36e-20
ILMN_2168347	EPOR	blue	0.640279	6.4e-22
ILMN_1681154	ZBTB39	blue	-0.609212	1.83e-19
ILMN_3241091	TMEM164	blue	0.658334	1.76e-23
ILMN_2399896	SEC31A	blue	-0.625303	1.06e-20
ILMN_3239460	OAZ2	blue	0.609277	1.81e-19
ILMN_1750497	HCAR2	blue	0.681165	1.29e-25
ILMN_1775734	SH2D3C	blue	0.730953	5.09e-31
ILMN_2324157	UBA3	blue	0.765122	1.75e-35
ILMN_1796138	BMX	blue	0.66437	5e-24
ILMN_2056032	CD99	blue	-0.605138	3.67e-19
ILMN_2389151	UGP2	blue	0.643684	3.31e-22
ILMN_1726547	MAP3K5	blue	0.763296	3.17e-35
ILMN_2342835	P2RY14	blue	0.616114	5.5e-20
ILMN_1804743	USP32	blue	0.837865	3.83e-48
ILMN_1732985	PHF20L1	blue	0.705249	4.34e-28
ILMN_1742981	TUBA1A	blue	0.715905	2.89e-29
ILMN_1692276	GGPS1	blue	0.701925	9.85e-28
ILMN_2336609	SYTL2	blue	-0.610248	1.53e-19
ILMN_1689342	NUBP1	blue	-0.623543	1.46e-20
ILMN_1696347	CTSC	blue	0.629281	5.1e-21
ILMN_1735367	HSD17B11	blue	0.769418	4.25e-36
ILMN_1750101	S100A11	blue	0.847471	2.78e-50
ILMN_2086064	SNRPC	blue	-0.737647	7.71e-32
ILMN_1812278	LY9	blue	-0.676274	3.83e-25
ILMN_2100287	CFAP58	blue	0.692555	9.35e-27
ILMN_1814282	AEN	blue	-0.633745	2.22e-21
ILMN_1685679	RNF146	blue	0.707455	2.5e-28
ILMN_1692261	EPHB1	blue	0.759115	1.21e-34
ILMN_1744146	PTTG2	blue	0.604243	4.27e-19
ILMN_2205050	PRKX	blue	-0.639521	7.41e-22
ILMN_1741727	QPCT	blue	0.81881	2.76e-44
ILMN_1709233	F5	blue	0.778469	1.94e-37
ILMN_2373010	TMEM70	blue	-0.643703	3.3e-22
ILMN_1685112	TACO1	blue	-0.652905	5.32e-23
ILMN_1763265	CHMP1B	blue	0.741752	2.36e-32
ILMN_1842582	TTC39C	blue	-0.670131	1.46e-24
ILMN_1734190	TCEAL3	blue	-0.741146	2.81e-32
ILMN_1657860	MINOS1	blue	-0.716967	2.2e-29
ILMN_1770161	BST1	blue	0.738206	6.57e-32
ILMN_3236270	ACAP2	blue	0.797726	1.64e-40
ILMN_2307740	CD46	blue	0.792593	1.16e-39
ILMN_1656040	NTN3	blue	0.697356	2.98e-27
ILMN_1753426	KIAA0556	blue	0.730855	5.23e-31
ILMN_1656066	TNPO2	blue	-0.663041	6.61e-24
ILMN_1773407	C16orf72	blue	0.678003	2.61e-25
ILMN_1810420	DYSF	blue	0.727557	1.3e-30
ILMN_1785005	NCF4	blue	0.85361	9.93e-52
ILMN_2166506	XRCC6	blue	-0.66579	3.7e-24
ILMN_1728844	PTPRN2	blue	0.63113	3.62e-21
ILMN_1655702	ABHD5	blue	0.850615	5.14e-51
ILMN_2114720	SLPI	blue	0.68861	2.35e-26
ILMN_1727574	ZNF827	blue	-0.647679	1.51e-22
ILMN_1771376	PEA15	blue	-0.67036	1.39e-24
ILMN_1698164	LOC729737	blue	0.680836	1.39e-25
ILMN_1804738	MEFV	blue	0.786606	1.07e-38
ILMN_2152402	ABHD16A	blue	0.609864	1.64e-19
ILMN_1789059	GDAP2	blue	0.601879	6.36e-19
ILMN_1776649	LRRK2	blue	0.846961	3.64e-50
ILMN_1758864	VNN2	blue	0.677819	2.72e-25
ILMN_1671839	TAF1C	blue	-0.636945	1.21e-21
ILMN_1744316	TATDN3	blue	0.61085	1.38e-19
ILMN_1688318	FRG1B	blue	-0.612163	1.1e-19
ILMN_1784238	SEC22B	blue	0.724655	2.85e-30
ILMN_1713668	TSNAX	blue	0.675038	5.03e-25
ILMN_2355665	MTFP1	blue	-0.668044	2.29e-24
ILMN_1718946	ADAM10	blue	0.754523	5.08e-34
ILMN_1712999	MGAM	blue	0.832868	4.38e-47
ILMN_1696004	LRRK1	blue	0.607965	2.27e-19
ILMN_1705066	BTBD11	blue	-0.638105	9.72e-22
ILMN_1764239	PMPCA	blue	-0.713245	5.76e-29
ILMN_1736054	SUB1	blue	0.635168	1.7e-21
ILMN_1751571	RAD23A	blue	-0.626184	9.02e-21
ILMN_1699496	PHF21A	blue	0.705628	3.95e-28
ILMN_1678437	FRY	blue	0.635172	1.7e-21
ILMN_1681520	DGAT2	blue	0.675805	4.25e-25
ILMN_1729294	RNF130	blue	0.752416	9.73e-34
ILMN_3307868	CHI3L1	blue	0.640724	5.88e-22
ILMN_1739541	NMI	blue	0.656755	2.43e-23
ILMN_1738632	PRKAR1A	blue	0.754514	5.1e-34
ILMN_3182762	RPL21	blue	-0.779366	1.42e-37
ILMN_1783985	COQ6	blue	-0.631691	3.26e-21
ILMN_1670410	LINC01001	blue	0.667206	2.74e-24
ILMN_1656327	GLT1D1	blue	0.755127	4.21e-34
ILMN_1768505	IL13RA1	blue	0.772177	1.68e-36
ILMN_1667561	IFRD1	blue	0.753841	6.27e-34
ILMN_1700855	LOC93432	blue	0.795557	3.77e-40
ILMN_1671731	AVPI1	blue	-0.663999	5.4e-24
ILMN_1796316	MMP9	blue	0.678633	2.27e-25
ILMN_1784364	STARD5	blue	-0.602028	6.21e-19
ILMN_2205882	NSUN7	blue	0.719785	1.05e-29
ILMN_2140799	FAM24B	blue	-0.623207	1.55e-20
ILMN_1778803	ZFAND6	blue	0.615891	5.72e-20
ILMN_1744034	GPR27	blue	0.649262	1.1e-22
ILMN_1699980	TSPAN18	blue	-0.602185	6.04e-19
ILMN_1688158	CYB5R4	blue	0.800762	5e-41
ILMN_2379130	IRAK1	blue	-0.678364	2.41e-25
ILMN_2387799	PDPK1	blue	0.617251	4.5e-20
ILMN_1678170	MME	blue	0.785018	1.9e-38
ILMN_2050911	SLC22A4	blue	0.792215	1.34e-39
ILMN_1801254	NAIP	blue	0.618327	3.72e-20
ILMN_1704870	PGLYRP1	blue	0.637149	1.17e-21
ILMN_1711361	ZNF319	blue	0.700105	1.53e-27
ILMN_1769024	FAM41C	blue	0.647154	1.68e-22
ILMN_1669502	E2F3	blue	0.629087	5.29e-21
ILMN_1662198	RANGAP1	blue	-0.72018	9.44e-30
ILMN_1751264	CCDC126	blue	0.677211	3.12e-25
ILMN_1762284	ASPRV1	blue	0.64934	1.09e-22
ILMN_1714592	CDA	blue	0.674362	5.84e-25
ILMN_2117623	PLXNC1	blue	0.703039	7.49e-28
ILMN_1769566	ATG3	blue	0.643067	3.73e-22
ILMN_2092333	GPR141	blue	0.626165	9.05e-21
ILMN_1686968	ZNF362	blue	-0.638559	8.91e-22
ILMN_1684278	SNORD38A	blue	-0.690687	1.45e-26
ILMN_1661809	PRRG4	blue	0.645535	2.31e-22
ILMN_1667460	SULF2	blue	0.618425	3.65e-20
ILMN_2329735	ECM1	blue	0.633106	2.5e-21
ILMN_1710979	ANKRD39	blue	-0.622668	1.71e-20
ILMN_1787897	CXCL1	blue	0.674509	5.65e-25
ILMN_1742456	OSTF1	blue	0.818893	2.66e-44
ILMN_1785615	SUMO1P1	blue	0.755603	3.63e-34
ILMN_1732923	SIPA1L2	blue	0.659048	1.52e-23
ILMN_1712748	GSKIP	blue	0.715328	3.36e-29
ILMN_1712487	EIF2D	blue	-0.625633	9.97e-21
ILMN_1798475	CSF2RB	blue	0.665549	3.9e-24
ILMN_3247653	LRFN1	blue	0.606775	2.78e-19
ILMN_2188533	RPL12	blue	-0.660398	1.15e-23
ILMN_2388112	CR1	blue	0.708702	1.83e-28
ILMN_1669033	NCOA1	blue	0.683091	8.34e-26
ILMN_3237926	CCNJL	blue	0.631907	3.13e-21
ILMN_1790689	CRISPLD2	blue	0.656353	2.64e-23
ILMN_2119692	CSAD	blue	0.608539	2.06e-19
ILMN_1756806	MCL1	blue	0.71284	6.39e-29
ILMN_1777853	MBOAT2	blue	0.67269	8.41e-25
ILMN_1657884	NME2	blue	-0.631814	3.19e-21
ILMN_1692742	DENND3	blue	0.636007	1.45e-21
ILMN_1790202	C1orf35	blue	-0.611478	1.24e-19
ILMN_1773125	ENTPD1	blue	0.726363	1.8e-30
ILMN_1724422	SELL	blue	0.720358	9e-30
ILMN_1794914	UBTD1	blue	0.616002	5.61e-20
ILMN_1715809	OGFRL1	blue	0.655242	3.31e-23
ILMN_1684402	STXBP5	blue	0.634428	1.95e-21
ILMN_1714650	RASGRP4	blue	0.630364	4.17e-21
ILMN_1676358	RALB	blue	0.653424	4.79e-23
ILMN_1724295	RPL36A	blue	-0.632562	2.77e-21
ILMN_2124757	RPL23AP32	blue	-0.628865	5.51e-21
ILMN_1670796	EXOSC10	blue	-0.715647	3.1e-29
ILMN_1730176	ITGAX	blue	0.632829	2.64e-21
ILMN_1714623	TOMM22	blue	-0.626961	7.82e-21
ILMN_1670926	CHST15	blue	0.698408	2.32e-27
ILMN_1815010	RNF141	blue	0.604842	3.86e-19
ILMN_2051232	SDHA	blue	-0.614012	7.96e-20
ILMN_1724822	LINC00999	blue	0.606936	2.7e-19
ILMN_1717337	2019-03-07	blue	0.614632	7.14e-20
ILMN_1808661	TOMM5	blue	-0.601118	7.23e-19
ILMN_2058795	CPQ	blue	0.629096	5.28e-21
ILMN_1761566	CYSTM1	blue	0.624912	1.14e-20
ILMN_1680397	CXCR2	blue	0.877884	3.57e-58
ILMN_1808047	PHC2	blue	0.61984	2.84e-20
ILMN_1766045	SH3GLB1	blue	0.613896	8.12e-20
ILMN_1700461	PTGES3L-AARSD1	blue	-0.61139	1.26e-19
ILMN_1765880	USB1	blue	0.621909	1.96e-20
ILMN_1753241	SNTA1	blue	-0.600257	8.35e-19
ILMN_1788213	FRAT2	blue	0.742476	1.91e-32
ILMN_1693009	FGL2	blue	0.659582	1.36e-23
ILMN_1738992	MNDA	blue	0.881119	3.9e-59
ILMN_1684271	ACBD6	blue	-0.561636	4.94e-16
ILMN_1758323	ACPP	blue	0.553119	1.4e-15
ILMN_1753411	ADCY10P1	blue	0.429868	2e-09
ILMN_1718808	AKAP10	blue	0.438651	9.77e-10
ILMN_2377240	AKTIP	blue	0.578165	2.52e-17
ILMN_1709348	ALDH1A1	blue	0.464201	9.38e-11
ILMN_2056002	ANP32AP1	blue	0.396951	3.44e-08
ILMN_1717594	AP5B1	blue	0.587123	6.36e-18
ILMN_1765876	ARHGAP24	blue	0.508991	4.36e-13
ILMN_1734742	ARHGDIA	blue	-0.572132	8.97e-17
ILMN_2347314	ARNT	blue	0.4916	3.15e-12
ILMN_1808115	ATP7A	blue	0.591012	2.3e-18
ILMN_1765858	CAB39	blue	0.44866	2.69e-10
ILMN_1678061	CASS4	blue	0.579769	1.24e-17
ILMN_1775183	CBX8	blue	0.5554	6.74e-16
ILMN_1653480	CCDC125	blue	0.529807	2.14e-14
ILMN_1743506	CCDC137	blue	-0.57946	3.58e-17
ILMN_1790555	CCDC146	blue	0.513923	1.83e-13
ILMN_2374425	CCNE1	blue	-0.546285	8.87e-13
ILMN_1797530	CHCHD5	blue	-0.45828	9.84e-11
ILMN_1791576	CHSY1	blue	0.540357	2.87e-15
ILMN_1654875	CLC	blue	0.466171	6.77e-11
ILMN_1691339	CLEC1A	blue	0.444459	4.05e-10
ILMN_2068274	CLEC9A	blue	0.468036	4.89e-11
ILMN_2323172	CSF3R	blue	0.484469	2.5e-12
ILMN_1688103	CTNNBIP1	blue	-0.476363	7.54e-05
ILMN_3307729	CXXC5	blue	-0.513906	2.18e-13
ILMN_1755741	DACH1	blue	0.544091	2.31e-10
ILMN_1762281	DCTN3	blue	-0.415082	8.62e-09
ILMN_1745737	DIS3L2	blue	-0.55378	1.05e-15
ILMN_2336728	DLG3	blue	-0.500164	1.43e-12
ILMN_2396020	DUSP6	blue	0.494625	0.00190485
ILMN_2073604	EBP	blue	-0.527356	5.24e-14
ILMN_2233604	ECSIT	blue	-0.552585	1.41e-15
ILMN_1794967	EIF4ENIF1	blue	0.538523	5.08e-15
ILMN_1770245	EPB41L5	blue	0.545241	5.34e-15
ILMN_2347805	EXOC1	blue	0.483176	7.07e-12
ILMN_2191929	FAM206A	blue	0.52201	7.15e-14
ILMN_1812441	FAM222B	blue	-0.578294	2.67e-17
ILMN_1704571	FAM53B	blue	-0.491511	6.29e-12
ILMN_1748473	GIMAP4	blue	0.581718	3.23e-17
ILMN_1680727	GLRX2	blue	0.507697	4.84e-13
ILMN_1703153	GLYR1	blue	0.538249	1.01e-14
ILMN_1733249	GNB4	blue	0.52841	3.06e-14
ILMN_1708841	GOLPH3	blue	0.59801	1.32e-18
ILMN_1789839	GTF3C1	blue	-0.593542	7.03e-18
ILMN_1764396	HDAC4	blue	0.502096	9.85e-13
ILMN_1779076	HINT3	blue	0.473506	2.17e-11
ILMN_1723486	HK2	blue	0.524496	6.43e-14
ILMN_1654920	HNRNPH3	blue	0.53995	4.39e-15
ILMN_1675671	ICOSLG	blue	-0.524575	4.36e-14
ILMN_2230892	IL10RB	blue	0.564055	3.41e-16
ILMN_1798619	KCTD17	blue	0.49834	1.72e-12
ILMN_1751656	KLF11	blue	-0.567983	2.02e-16
ILMN_1692785	KLHL21	blue	0.479432	6.84e-12
ILMN_3248247	LINC00265	blue	0.527956	1.68e-14
ILMN_1688435	LOC155060	blue	-0.534143	1.42e-14
ILMN_1694708	LOC283788	blue	-0.437557	2.72e-05
ILMN_1662417	LRPPRC	blue	-0.592661	2.91e-12
ILMN_3237645	LRTOMT	blue	0.453073	1.74e-10
ILMN_1749244	LYRM1	blue	0.57604	5.73e-17
ILMN_2375003	MAP4K4	blue	0.565051	7.82e-17
ILMN_1681503	MCM2	blue	-0.575884	6.04e-17
ILMN_1680171	MFF	blue	0.499026	0.423038
ILMN_1658486	MRPL54	blue	-0.598895	6.52e-19
ILMN_1746948	MYL5	blue	-0.583858	1.02e-17
ILMN_1812622	NEIL1	blue	-0.485276	8.33e-12
ILMN_1791925	NFAM1	blue	0.542956	5.76e-15
ILMN_1725441	NFATC2IP	blue	-0.525757	3.59e-14
ILMN_1689747	NOL8	blue	-0.526717	2.73e-14
ILMN_1748591	ODC1	blue	-0.526051	4.96e-14
ILMN_3195203	OGFOD3	blue	-0.598284	3.55e-05
ILMN_1719303	P4HB	blue	-0.537117	9.12e-15
ILMN_1731354	PARL	blue	-0.597909	1.15e-18
ILMN_1728498	PCBP4	blue	-0.542257	6.24e-15
ILMN_2278819	PDE7A	blue	0.57885	2.51e-17
ILMN_2169736	PGBD4	blue	-0.501354	7.97e-08
ILMN_2075051	PGS1	blue	0.481752	4.38e-12
ILMN_1772743	PIGK	blue	0.438903	6.73e-10
ILMN_1809245	PITPNB	blue	-0.497316	2.04e-08
ILMN_1667201	POC1B	blue	0.530915	3.3e-14
ILMN_2396996	PPCS	blue	0.568216	1.81e-16
ILMN_1781198	PPP1R3D	blue	0.576907	1.96e-17
ILMN_1662617	PPP2R3C	blue	0.550035	9.31e-11
ILMN_1732725	PPP6R3	blue	-0.560529	6.65e-16
ILMN_2117223	PTBP3	blue	0.467597	4.38e-07
ILMN_2054297	PTGS2	blue	0.567999	1.11e-16
ILMN_2042771	PTTG1	blue	-0.557091	1.31e-20
ILMN_1733045	RAB36	blue	0.449858	2.32e-10
ILMN_1781454	RAE1	blue	-0.528203	3.4e-11
ILMN_1809191	RAP1A	blue	0.538587	5.12e-15
ILMN_1655733	RFC2	blue	0.55365	9.67e-16
ILMN_1805643	RILPL1	blue	0.581629	1.61e-17
ILMN_3238353	RNASEH2C	blue	-0.442813	5.55e-10
ILMN_1738883	RNF135	blue	0.54819	1.5e-15
ILMN_1762787	RNF26	blue	-0.561459	3.66e-16
ILMN_1714809	RPIA	blue	-0.542423	3.31e-15
ILMN_1720438	RPL26L1	blue	0.556314	2.24e-10
ILMN_3246209	SCARNA10	blue	-0.494071	2.1e-12
ILMN_2285802	SEC14L1	blue	0.592368	8.17e-19
ILMN_1676600	SEC24C	blue	-0.501203	1.81e-12
ILMN_1733874	SH2D2A	blue	-0.518099	1.48e-13
ILMN_1769886	SIRPD	blue	0.570393	5.02e-17
ILMN_1790472	SLC25A28	blue	-0.444735	4.16e-10
ILMN_1758938	SLC31A2	blue	0.569122	1.08e-16
ILMN_1660730	SLC7A3	blue	-0.583037	1.1e-17
ILMN_1767377	SMA4	blue	0.543482	3.52e-15
ILMN_2189842	SNORA10	blue	-0.469858	4.5e-11
ILMN_2165762	SNORD34	blue	-0.516246	1.12e-13
ILMN_1667609	SNORD35A	blue	-0.370436	3.63e-07
ILMN_1813491	SPTLC1	blue	0.471873	1.76e-11
ILMN_1683313	ST3GAL1	blue	-0.569232	7.34e-11
ILMN_1713496	ST3GAL5	blue	-0.576478	4.14e-17
ILMN_1702175	ST7	blue	-0.463745	8.98e-11
ILMN_1781135	STAM2	blue	0.518746	8.96e-14
ILMN_2228873	STARD3NL	blue	0.570735	9.58e-17
ILMN_1810875	SYNGR1	blue	-0.433646	1.66e-06
ILMN_1759250	TAP2	blue	0.524381	5.03e-14
ILMN_1671387	TCAIM	blue	0.485014	8.13e-12
ILMN_1785821	TDP2	blue	0.594218	1.41e-18
ILMN_1786847	TGM3	blue	0.566591	1.09e-16
ILMN_1652486	THAP7	blue	-0.581951	2.03e-17
ILMN_1873075	TNRC6C	blue	-0.460703	1.04e-06
ILMN_2113938	TOR1AIP2	blue	0.512361	2.01e-13
ILMN_1651950	TPST1	blue	0.585311	5.46e-18
ILMN_1746704	TRIM8	blue	0.571752	3.49e-17
ILMN_1782954	UBE2K	blue	0.549868	2.41e-15
ILMN_2110281	UFC1	blue	-0.463862	6.24e-28
ILMN_1665557	USP15	blue	0.578721	1.35e-17
ILMN_2223010	VBP1	blue	0.552425	1.35e-15
ILMN_1662896	WDR11	blue	-0.511587	2.84e-13
ILMN_1678957	WDR55	blue	-0.48812	5.4e-12
ILMN_1766010	YARS	blue	-0.563026	1.25e-16
ILMN_2309926	ZDHHC14	blue	-0.506661	6.34e-13
ILMN_2209299	ZNF333	blue	0.497043	1.49e-12
brown
substanceBXH	geneSymbol	moduleColor	ModuleMembership	MMPvalue
ILMN_1679555	TIMM23	brown	0.863966	2.52e-54
ILMN_1806106	GNL3	brown	0.889931	6.64e-62
ILMN_2330267	ABCE1	brown	0.887803	3.25e-61
ILMN_1703697	LANCL1	brown	0.922316	1.38e-74
ILMN_1706238	CSE1L	brown	0.896318	4.61e-64
ILMN_1802157	THOC1	brown	0.924397	1.39e-75
ILMN_1765401	RRN3	brown	0.875766	1.47e-57
ILMN_1658678	SAAL1	brown	0.9053	2.38e-67
ILMN_1729775	OPA1	brown	0.870347	4.92e-56
ILMN_2373266	SREK1	brown	0.891384	2.2e-62
ILMN_1688971	NOL11	brown	0.946098	4.27e-88
ILMN_2202637	CRY1	brown	0.845551	7.63e-50
ILMN_1745887	FBXO21	brown	0.898194	1.01e-64
ILMN_1677829	SLC9A6	brown	0.817053	5.94e-44
ILMN_1696568	ATP2C1	brown	0.872506	1.24e-56
ILMN_1679071	MTX3	brown	0.892772	7.57e-63
ILMN_1771593	RRM1	brown	0.796822	2.32e-40
ILMN_1734826	NUP88	brown	0.919751	2.14e-73
ILMN_1814113	ZFR	brown	0.874726	2.93e-57
ILMN_1751330	RBCK1	brown	-0.863777	2.82e-54
ILMN_1676448	WDFY1	brown	0.809692	1.35e-42
ILMN_1798654	MCM6	brown	0.842781	3.21e-49
ILMN_1751378	RARS	brown	0.801132	4.32e-41
ILMN_2364110	GBA	brown	-0.886437	8.86e-61
ILMN_1741917	OSCAR	brown	-0.863106	4.21e-54
ILMN_1725594	FAM188A	brown	0.842767	3.23e-49
ILMN_1691466	YES1	brown	0.86606	7.08e-55
ILMN_2217935	RFC1	brown	0.868928	1.2e-55
ILMN_1771026	GARS	brown	0.811424	6.56e-43
ILMN_2347949	G6PD	brown	-0.880884	4.59e-59
ILMN_1703955	FBXO32	brown	0.81096	7.96e-43
ILMN_1769911	SLC38A1	brown	0.882268	1.75e-59
ILMN_1805481	TRMT11	brown	0.877887	3.57e-58
ILMN_1758963	NADK	brown	-0.912559	2.96e-70
ILMN_2312719	EXOSC9	brown	0.835629	1.15e-47
ILMN_1801869	WDR75	brown	0.911834	5.92e-70
ILMN_1767837	GOLT1B	brown	0.887621	3.72e-61
ILMN_1691798	ZNF26	brown	0.812153	4.83e-43
ILMN_1706558	TRMT61B	brown	0.85059	5.21e-51
ILMN_1785202	STAT4	brown	0.825124	1.64e-45
ILMN_2041161	DENND4A	brown	0.830428	1.4e-46
ILMN_1786189	NIFK	brown	0.837652	4.25e-48
ILMN_2391551	PROSER1	brown	0.833806	2.79e-47
ILMN_1773066	CDKN2AIP	brown	0.853241	1.22e-51
ILMN_1676946	AP3M2	brown	0.809843	1.27e-42
ILMN_1662129	RCN2	brown	0.857222	1.3e-52
ILMN_1657873	XPO4	brown	0.865193	1.2e-54
ILMN_1731275	DPEP3	brown	-0.745853	7.05e-33
ILMN_2129388	CCSER2	brown	0.820592	1.26e-44
ILMN_1769671	RYK	brown	0.887989	2.83e-61
ILMN_1688034	COIL	brown	0.786594	1.07e-38
ILMN_1721225	AAR2	brown	0.71411	4.61e-29
ILMN_1690352	ADO	brown	0.777048	3.18e-37
ILMN_1679800	BRIX1	brown	0.893247	5.23e-63
ILMN_2243553	ZNF275	brown	0.792367	1.26e-39
ILMN_1657682	GFM1	brown	0.840591	9.78e-49
ILMN_1763198	STAT6	brown	-0.822816	4.67e-45
ILMN_1704557	RPS6KB1	brown	0.896476	4.06e-64
ILMN_1745421	ZMAT5	brown	-0.67461	5.53e-25
ILMN_2198393	KATNA1	brown	0.75572	3.5e-34
ILMN_3265365	CEP78	brown	0.769152	4.64e-36
ILMN_1767892	DUSP12	brown	0.826553	8.52e-46
ILMN_1741204	KLHDC2	brown	0.869596	7.9e-56
ILMN_1714444	KLF12	brown	0.87814	3.01e-58
ILMN_1767509	DEF8	brown	-0.829228	2.46e-46
ILMN_1768391	ARL4C	brown	0.744589	1.03e-32
ILMN_1695079	ZNF101	brown	0.781107	7.68e-38
ILMN_1799069	CNOT6L	brown	0.833364	3.45e-47
ILMN_1783285	CTPS1	brown	0.740579	3.32e-32
ILMN_1748476	NOP58	brown	0.853733	9.27e-52
ILMN_1746276	EPC1	brown	0.715631	3.11e-29
ILMN_2355033	KIAA1147	brown	0.89634	4.53e-64
ILMN_1794260	KDM2B	brown	0.830013	1.7e-46
ILMN_1720270	CDR2	brown	0.855511	3.43e-52
ILMN_1680644	MIOS	brown	0.820748	1.17e-44
ILMN_1781184	MYBPC3	brown	-0.793393	8.59e-40
ILMN_2387742	HNRNPA1L2	brown	0.768628	5.53e-36
ILMN_1738677	PRPF8	brown	0.683282	7.98e-26
ILMN_1755909	GID8	brown	0.759276	1.15e-34
ILMN_1753805	PRKD2	brown	-0.738627	5.82e-32
ILMN_1660027	FCGR2B	brown	-0.752004	1.1e-33
ILMN_1813091	ARL1	brown	0.753093	7.9e-34
ILMN_2408450	UBA5	brown	0.792877	1.04e-39
ILMN_2050617	CCT6P1	brown	0.799188	9.26e-41
ILMN_3269719	ARAP1	brown	-0.795373	4.04e-40
ILMN_1661485	RBM34	brown	0.866785	4.54e-55
ILMN_1770787	DDAH2	brown	-0.762672	3.87e-35
ILMN_1693650	FES	brown	-0.883777	6.02e-60
ILMN_1776778	PARP15	brown	0.769139	4.66e-36
ILMN_2072391	SNORD31	brown	0.792376	1.26e-39
ILMN_1800626	SESN1	brown	0.68159	1.17e-25
ILMN_2196337	ASUN	brown	0.722096	5.67e-30
ILMN_1693242	ZNF296	brown	-0.714877	3.78e-29
ILMN_1815024	PRDX5	brown	-0.766855	9.93e-36
ILMN_1669718	PSENEN	brown	-0.763963	2.55e-35
ILMN_1718297	EML4	brown	0.780566	9.3e-38
ILMN_1673138	ZBTB33	brown	0.738027	6.92e-32
ILMN_1726743	MRPS30	brown	0.81324	3.05e-43
ILMN_1859946	UHMK1	brown	0.794164	6.41e-40
ILMN_1702384	ZNF706	brown	0.628331	6.08e-21
ILMN_1799890	ZFYVE20	brown	0.642476	4.19e-22
ILMN_1702177	GLO1	brown	0.793214	9.19e-40
ILMN_2108938	FNBP4	brown	0.859221	4.13e-53
ILMN_1789436	DENND1B	brown	0.717173	2.08e-29
ILMN_1689665	NAE1	brown	0.903911	8.06e-67
ILMN_1754315	MMAA	brown	0.737099	9.02e-32
ILMN_1720965	TULP4	brown	0.714035	4.7e-29
ILMN_1747857	SMARCE1	brown	0.792658	1.13e-39
ILMN_1740819	STARD7	brown	0.667641	2.5e-24
ILMN_2220187	GFPT1	brown	0.833223	3.7e-47
ILMN_1692225	DOK3	brown	-0.695554	4.59e-27
ILMN_1658259	DRG1	brown	0.785356	1.68e-38
ILMN_1709611	PSMA1	brown	0.807831	2.91e-42
ILMN_1781906	RBM17	brown	0.71386	4.91e-29
ILMN_1751561	CAMK1D	brown	-0.756463	2.78e-34
ILMN_1730504	AGPAT4	brown	0.601997	6.24e-19
ILMN_1711904	MXD3	brown	-0.706872	2.89e-28
ILMN_1763228	MEF2D	brown	0.684095	6.64e-26
ILMN_1723729	RSL1D1	brown	0.65319	5.02e-23
ILMN_1664644	ATG16L2	brown	-0.838472	2.83e-48
ILMN_1753112	CD5	brown	0.71605	2.79e-29
ILMN_1749362	CD28	brown	0.756634	2.63e-34
ILMN_2364272	MBNL2	brown	0.841728	5.49e-49
ILMN_2067708	TFB2M	brown	0.749481	2.38e-33
ILMN_2153373	LRBA	brown	0.667343	2.66e-24
ILMN_1678671	KLHL24	brown	0.776056	4.48e-37
ILMN_1727309	RMDN3	brown	0.7651	1.76e-35
ILMN_1676423	CCNC	brown	0.830575	1.31e-46
ILMN_1724884	SNORD22	brown	0.725938	2.02e-30
ILMN_1711493	PRAM1	brown	-0.780355	1e-37
ILMN_1771734	GMPS	brown	0.796596	2.53e-40
ILMN_2381753	G3BP2	brown	0.728684	9.52e-31
ILMN_1770053	RBBP7	brown	0.819693	1.87e-44
ILMN_2154101	UPRT	brown	0.746381	6.02e-33
ILMN_1676842	BTAF1	brown	0.845278	8.8e-50
ILMN_1696708	C14orf166	brown	0.830722	1.22e-46
ILMN_1656186	SLC41A1	brown	0.759121	1.2e-34
ILMN_2210729	STYXL1	brown	-0.775974	4.61e-37
ILMN_1701216	BANP	brown	-0.7901	2.95e-39
ILMN_1752394	CCNB1IP1	brown	0.775957	4.64e-37
ILMN_1691567	GNPDA2	brown	0.727152	1.45e-30
ILMN_1763144	NEU1	brown	-0.749606	2.29e-33
ILMN_1690546	PPP3CC	brown	0.809113	1.72e-42
ILMN_1811195	ZNF211	brown	0.661112	9.89e-24
ILMN_1776858	DUS4L	brown	0.798302	1.31e-40
ILMN_2385191	QRICH1	brown	0.735317	1.5e-31
ILMN_1760303	PIK3R1	brown	0.710702	1.1e-28
ILMN_1791949	PGBD1	brown	0.734819	1.72e-31
ILMN_1723414	HACL1	brown	0.794654	5.32e-40
ILMN_1676159	STK26	brown	0.642663	4.04e-22
ILMN_1683664	FAM60A	brown	0.76194	4.9e-35
ILMN_1655734	RPF1	brown	0.795813	3.42e-40
ILMN_1682095	RCOR3	brown	0.665047	4.33e-24
ILMN_1658182	MEX3C	brown	0.731555	4.3e-31
ILMN_1757408	ZNF256	brown	0.758196	1.61e-34
ILMN_1737170	FLII	brown	-0.808492	2.22e-42
ILMN_1761113	GNL2	brown	0.751338	1.35e-33
ILMN_1653648	GPR63	brown	-0.711877	8.17e-29
ILMN_1738642	CMPK1	brown	0.805474	7.61e-42
ILMN_3282436	EIF3F	brown	0.771121	2.4e-36
ILMN_1703524	SRP68	brown	0.604136	4.35e-19
ILMN_1670302	HK3	brown	-0.817383	5.15e-44
ILMN_1667260	MAPK3	brown	-0.71702	2.17e-29
ILMN_2093674	GMFB	brown	0.771275	2.28e-36
ILMN_1814122	MDC1	brown	0.687629	2.95e-26
ILMN_3181347	MRVI1-AS1	brown	-0.685561	4.75e-26
ILMN_2089977	FKBP9P1	brown	-0.647209	1.66e-22
ILMN_1739368	ZSCAN25	brown	0.710457	1.17e-28
ILMN_1761260	COBLL1	brown	0.712106	7.71e-29
ILMN_1670420	METAP2	brown	0.734251	2.02e-31
ILMN_1676515	IMPDH1	brown	-0.74715	4.79e-33
ILMN_1735735	KATNB1	brown	-0.78073	8.78e-38
ILMN_1742461	UAP1	brown	0.72085	7.9e-30
ILMN_1651557	KDELC2	brown	0.684635	5.87e-26
ILMN_2147306	PNRC2	brown	0.781354	7.04e-38
ILMN_1738736	SNX4	brown	0.845765	6.82e-50
ILMN_1805225	LPCAT3	brown	-0.76553	1.53e-35
ILMN_1802458	AGTRAP	brown	-0.836803	6.47e-48
ILMN_1784287	TGFBR3	brown	0.644031	3.09e-22
ILMN_1723662	ABHD2	brown	-0.680404	1.53e-25
ILMN_1684964	ZNF212	brown	0.640649	5.96e-22
ILMN_1665621	HSF1	brown	-0.660544	1.11e-23
ILMN_1667222	MTX1	brown	-0.791881	1.52e-39
ILMN_1734596	TC2N	brown	0.77482	6.85e-37
ILMN_1735180	NCSTN	brown	-0.636022	1.44e-21
ILMN_1798712	USP4	brown	-0.830536	1.33e-46
ILMN_1667199	SQRDL	brown	-0.705664	3.91e-28
ILMN_1735788	TRIOBP	brown	-0.832085	6.38e-47
ILMN_3275696	SNX5	brown	0.787992	6.42e-39
ILMN_2119774	CYP2R1	brown	0.676228	3.87e-25
ILMN_1678494	ZNF438	brown	-0.782514	4.66e-38
ILMN_1695468	SRPK2	brown	-0.603997	4.45e-19
ILMN_1673804	ZNF426	brown	0.600736	7.7e-19
ILMN_1660840	DESI2	brown	0.696872	3.35e-27
ILMN_2092664	ADSS	brown	0.785037	1.88e-38
ILMN_1682368	LRWD1	brown	-0.693478	7.52e-27
ILMN_1695276	MAPRE2	brown	0.667571	2.54e-24
ILMN_1652906	GBGT1	brown	-0.710863	1.06e-28
ILMN_1793386	MED12	brown	-0.72382	3.57e-30
ILMN_1651504	FAM193A	brown	-0.652633	5.62e-23
ILMN_1703279	CXorf57	brown	0.690371	1.56e-26
ILMN_1797425	DDX55	brown	0.6473	1.63e-22
ILMN_2181892	BEX2	brown	0.750418	1.79e-33
ILMN_1680937	HIST1H2BC	brown	-0.640171	6.54e-22
ILMN_1739156	DOPEY1	brown	0.691676	1.15e-26
ILMN_1789508	GTF3C3	brown	0.799004	9.96e-41
ILMN_1678054	TRIM21	brown	-0.616039	5.57e-20
ILMN_3283592	SPDYE6	brown	-0.604644	3.99e-19
ILMN_2119224	KIFAP3	brown	0.69685	3.37e-27
ILMN_1672114	TNFRSF10C	brown	-0.706056	3.55e-28
ILMN_1769926	DBN1	brown	-0.682319	9.93e-26
ILMN_1712320	DDX50	brown	0.707428	2.52e-28
ILMN_1741954	SMYD3	brown	0.658994	1.53e-23
ILMN_2128087	NAA30	brown	0.60709	2.63e-19
ILMN_1753712	STX10	brown	-0.766271	1.2e-35
ILMN_1717868	CCT8	brown	0.71239	7.17e-29
ILMN_1791093	PPHLN1	brown	0.737381	8.32e-32
ILMN_3250870	USP46	brown	0.637542	1.08e-21
ILMN_1674297	HCFC2	brown	0.790015	3.04e-39
ILMN_1660193	ZNF529	brown	0.790194	2.85e-39
ILMN_1657697	SAR1A	brown	0.702559	8.43e-28
ILMN_1670807	FAM84B	brown	0.654731	3.67e-23
ILMN_1739083	SIRT1	brown	0.657291	2.18e-23
ILMN_1765547	IRF2	brown	-0.656553	2.53e-23
ILMN_2056551	RBMX2	brown	0.635891	1.48e-21
ILMN_1749930	NDC1	brown	0.689758	1.8e-26
ILMN_1737988	PRNP	brown	0.746213	6.33e-33
ILMN_2282641	TBXAS1	brown	-0.786335	1.18e-38
ILMN_1678268	VPS8	brown	-0.70695	2.84e-28
ILMN_1703015	ZRANB2	brown	0.74578	7.2e-33
ILMN_1788810	NAA25	brown	0.627656	6.88e-21
ILMN_1652594	ACTR5	brown	0.65112	7.62e-23
ILMN_1657810	PPM1M	brown	-0.722485	5.11e-30
ILMN_1683888	SRP72	brown	0.762453	4.16e-35
ILMN_1755391	ARL2BP	brown	0.701275	1.15e-27
ILMN_1803277	MVP	brown	-0.821572	8.14e-45
ILMN_1687947	HIST1H2BE	brown	-0.607181	2.59e-19
ILMN_1763640	NCKAP5L	brown	-0.615255	6.4e-20
ILMN_1651719	MBTPS1	brown	0.623176	1.56e-20
ILMN_1730454	FOLR3	brown	-0.665331	4.08e-24
ILMN_2406468	NFU1	brown	0.774518	7.6e-37
ILMN_1683817	UBE2Q2	brown	0.70874	1.81e-28
ILMN_2062381	LCOR	brown	0.631344	3.48e-21
ILMN_2107991	HABP4	brown	0.786132	1.27e-38
ILMN_2379718	RAB24	brown	-0.785905	1.38e-38
ILMN_1764813	B3GALTL	brown	0.634176	2.05e-21
ILMN_1754149	LETMD1	brown	0.702934	7.69e-28
ILMN_1799688	CDC23	brown	0.700191	1.5e-27
ILMN_1660629	NBEAL2	brown	-0.72956	7.48e-31
ILMN_1721138	GRPEL2	brown	0.718868	1.33e-29
ILMN_1749405	KIAA1191	brown	0.769062	4.78e-36
ILMN_2414826	VPS13A	brown	0.607599	2.41e-19
ILMN_1705743	ARHGEF40	brown	-0.708179	2.09e-28
ILMN_1751143	TMEM243	brown	0.716917	2.22e-29
ILMN_1745904	CCDC6	brown	0.753369	7.26e-34
ILMN_2096747	SNORA33	brown	0.731207	4.74e-31
ILMN_1738523	MYD88	brown	-0.730798	5.31e-31
ILMN_1733421	PRKCQ	brown	0.677019	3.25e-25
ILMN_1700307	ZNF815P	brown	0.701174	1.18e-27
ILMN_1806473	BEX5	brown	0.681773	1.12e-25
ILMN_1696126	STX18	brown	0.601588	6.68e-19
ILMN_2192693	EIF3M	brown	0.713461	5.44e-29
ILMN_1748650	MRPL45	brown	0.691364	1.24e-26
ILMN_2128967	C11orf1	brown	0.68679	3.58e-26
ILMN_2182335	ARID2	brown	0.753131	7.81e-34
ILMN_2198878	INPP4B	brown	0.681353	1.23e-25
ILMN_2065690	GRAMD3	brown	0.609848	1.64e-19
ILMN_1813314	HIST1H2BK	brown	-0.611936	1.14e-19
ILMN_2213199	CEP44	brown	0.687477	3.06e-26
ILMN_1733690	AKAP7	brown	0.696629	3.55e-27
ILMN_1849013	IL6ST	brown	0.659115	1.5e-23
ILMN_1716071	PAQR3	brown	0.708125	2.11e-28
ILMN_1704305	NIP7	brown	0.699266	1.88e-27
ILMN_2182750	DDX1	brown	0.637977	9.96e-22
ILMN_1771223	PADI2	brown	-0.610109	1.57e-19
ILMN_1655622	PRKRIR	brown	0.684408	6.18e-26
ILMN_1668540	ZNHIT6	brown	0.805148	8.68e-42
ILMN_1674231	CHAF1B	brown	0.640916	5.66e-22
ILMN_1653129	CSTF2	brown	0.72094	7.71e-30
ILMN_1753002	RAB2B	brown	0.716472	2.5e-29
ILMN_2349658	TSPO	brown	-0.647399	1.6e-22
ILMN_2150196	LRRC25	brown	-0.603607	4.76e-19
ILMN_1715674	ITPK1	brown	-0.733125	2.78e-31
ILMN_1697670	SRRM1	brown	0.656603	2.51e-23
ILMN_2079386	RPL22	brown	0.722505	5.08e-30
ILMN_1702009	SV2A	brown	-0.66623	3.37e-24
ILMN_1747506	DHX34	brown	-0.773962	9.19e-37
ILMN_2344956	ACP1	brown	0.671186	1.17e-24
ILMN_2176955	CUL5	brown	0.777163	3.06e-37
ILMN_1798886	NUDT21	brown	0.68187	1.1e-25
ILMN_1727495	L3MBTL3	brown	0.682952	8.61e-26
ILMN_1788689	PHIP	brown	0.634598	1.89e-21
ILMN_1806733	COL18A1	brown	-0.663035	6.62e-24
ILMN_1701374	NUP35	brown	0.61742	4.37e-20
ILMN_1671257	DKC1	brown	0.683568	7.48e-26
ILMN_1720442	NCBP2	brown	0.774854	6.77e-37
ILMN_1750981	SLC25A26	brown	0.675608	4.44e-25
ILMN_1745075	RPLP0	brown	0.604016	4.44e-19
ILMN_1780769	TUBB4B	brown	-0.727707	1.24e-30
ILMN_1801109	NAA16	brown	0.67807	2.57e-25
ILMN_1801043	GSN	brown	-0.692945	8.53e-27
ILMN_1805828	VRK1	brown	0.677842	2.71e-25
ILMN_2160160	SNORD36C	brown	0.685811	4.48e-26
ILMN_2224444	SNX25	brown	0.685025	5.37e-26
ILMN_2382354	SENP7	brown	0.675706	4.35e-25
ILMN_1753243	DNAJB11	brown	0.655293	3.28e-23
ILMN_1810436	DNAJC27	brown	0.702268	9.05e-28
ILMN_1778111	LINC01000	brown	-0.658509	1.7e-23
ILMN_1688011	UPF1	brown	-0.699903	1.61e-27
ILMN_2337941	COPS8	brown	0.699456	1.8e-27
ILMN_2119486	DMTF1	brown	0.719605	1.1e-29
ILMN_1661833	ANKRD12	brown	0.662176	7.92e-24
ILMN_1671158	MRPL13	brown	0.624473	1.23e-20
ILMN_2366790	DDX52	brown	0.635897	1.48e-21
ILMN_1767168	CAMK4	brown	0.631921	3.12e-21
ILMN_1688299	RCAN3	brown	0.644622	2.76e-22
ILMN_1724250	GRN	brown	-0.662077	8.09e-24
ILMN_1663437	NECAB2	brown	-0.662326	7.68e-24
ILMN_2042595	PCM1	brown	0.702783	7.97e-28
ILMN_3235027	TAF1D	brown	0.659244	1.46e-23
ILMN_2257015	AGER	brown	-0.629931	4.52e-21
ILMN_2324574	RALGAPA1	brown	0.710415	1.19e-28
ILMN_1664706	HIST2H3D	brown	-0.608053	2.23e-19
ILMN_1689160	DPEP2	brown	-0.659521	1.38e-23
ILMN_1720531	KDM4B	brown	-0.707315	2.59e-28
ILMN_2331636	ACACA	brown	0.669194	1.79e-24
ILMN_2382505	SLC22A18	brown	-0.629292	5.09e-21
ILMN_1702301	DOCK10	brown	0.747822	3.92e-33
ILMN_1681239	MYO1F	brown	-0.7097	1.42e-28
ILMN_1774083	TRIAP1	brown	0.732639	3.18e-31
ILMN_1783333	CMC2	brown	0.647502	1.56e-22
ILMN_1810488	NFYC	brown	-0.629991	4.47e-21
ILMN_1761486	BORA	brown	0.645225	2.45e-22
ILMN_1664167	RPF2	brown	0.688426	2.45e-26
ILMN_2128795	LRIG1	brown	0.683893	6.95e-26
ILMN_1779010	MAP3K3	brown	-0.63817	9.6e-22
ILMN_1779376	GSK3B	brown	-0.629112	5.26e-21
ILMN_2128668	FOXJ3	brown	0.719504	1.13e-29
ILMN_2286514	GTPBP8	brown	0.60406	4.41e-19
ILMN_1672834	SSH2	brown	-0.622994	1.61e-20
ILMN_1757995	PARP2	brown	0.624061	1.33e-20
ILMN_1806778	UBE2E1	brown	0.604783	3.9e-19
ILMN_1733390	LARP1B	brown	0.654809	3.62e-23
ILMN_1741156	ARMCX5	brown	0.611017	1.34e-19
ILMN_2101920	HNRNPH1	brown	0.637954	1e-21
ILMN_2048982	ZBTB25	brown	0.696243	3.9e-27
ILMN_1672006	SSB	brown	0.646621	1.86e-22
ILMN_1736340	ANGEL2	brown	0.679767	1.76e-25
ILMN_1720311	SLC25A46	brown	0.628119	6.32e-21
ILMN_1745343	ZMAT2	brown	-0.639119	8e-22
ILMN_1752582	RAB5B	brown	-0.604665	3.98e-19
ILMN_1755222	CAAP1	brown	0.614823	6.9e-20
ILMN_1739397	GLMN	brown	0.6614	9.32e-24
ILMN_2231928	MX2	brown	-0.62055	2.5e-20
ILMN_1792679	ITGA5	brown	-0.601142	7.2e-19
ILMN_2342250	ZXDA	brown	0.637087	1.18e-21
ILMN_1815924	NUP107	brown	0.676252	3.85e-25
ILMN_1677768	POR	brown	-0.643832	3.22e-22
ILMN_1699160	ITK	brown	0.648042	1.41e-22
ILMN_1806448	NTNG2	brown	-0.606655	2.84e-19
ILMN_1711878	ENOPH1	brown	0.677259	3.08e-25
ILMN_2194649	TADA1	brown	0.663492	6.01e-24
ILMN_1670130	ARID3A	brown	-0.665916	3.61e-24
ILMN_1698406	ORMDL1	brown	0.630688	3.93e-21
ILMN_1749432	MRPL32	brown	0.720954	7.68e-30
ILMN_2322935	MAPKAPK5	brown	0.713971	4.78e-29
ILMN_1740015	CD14	brown	-0.616175	5.44e-20
ILMN_2168449	DHX15	brown	0.661442	9.23e-24
ILMN_1812070	ABCB1	brown	0.571549	2.58e-16
ILMN_1767362	ADAMTS6	brown	0.497262	1.47e-12
ILMN_1702858	ADHFE1	brown	0.350072	3.35e-08
ILMN_2358626	ADK	brown	0.572061	1.28e-17
ILMN_1775235	AFF3	brown	0.463627	4.57e-11
ILMN_1791006	AHI1	brown	0.58498	1.64e-17
ILMN_1801606	AMZ2	brown	0.537368	1.68e-14
ILMN_3241218	ANKIB1	brown	0.459634	1.37e-10
ILMN_1815051	API5	brown	0.508131	2.17e-05
ILMN_1711490	ARHGAP26	brown	-0.465119	8.73e-23
ILMN_2382657	ARHGAP9	brown	-0.594487	4.68e-18
ILMN_1733861	ARHGEF11	brown	-0.58929	1.72e-18
ILMN_1797964	ARL6IP6	brown	-0.57264	3.85e-17
ILMN_1720604	ARSG	brown	-0.500982	6.7e-13
ILMN_1806705	ASB6	brown	-0.449712	1.58e-10
ILMN_2407824	ATP1B1	brown	0.479211	8.54e-12
ILMN_1783304	ATP1B3	brown	0.528286	5.14e-14
ILMN_1661646	BANK1	brown	0.527465	1.82e-14
ILMN_1747217	C15orf41	brown	0.441391	9.24e-10
ILMN_1697800	C16orf86	brown	-0.488299	3.12e-12
ILMN_3247988	C17orf98	brown	0.430841	1.55e-09
ILMN_2077886	C1orf109	brown	0.572989	5.15e-17
ILMN_3236244	C1orf174	brown	0.407741	2.63e-08
ILMN_1797735	C1orf21	brown	0.54984	0.0082221
ILMN_1664047	CACNA1E	brown	-0.584473	1.39e-17
ILMN_1711049	CACNA2D2	brown	0.304795	0.00587373
ILMN_1699809	CAPNS2	brown	-0.562074	2.26e-16
ILMN_1726591	CARD16	brown	-0.521201	2.03e-13
ILMN_2326509	CASP1	brown	-0.59586	3.4e-29
ILMN_2388155	CASP3	brown	0.594944	7.61e-16
ILMN_1722622	CD163	brown	-0.502269	2.32e-12
ILMN_1774930	CDC14A	brown	0.508719	3.64e-13
ILMN_1713006	CDC34	brown	-0.49276	1.68e-12
ILMN_1656415	CDKN2C	brown	0.361606	1.04e-06
ILMN_1745949	CEACAM21	brown	-0.421378	5.45e-09
ILMN_1767662	CERS6	brown	0.506178	5.8e-13
ILMN_1658121	CFP	brown	-0.569265	9.86e-17
ILMN_1785161	CHCHD6	brown	0.577269	9.78e-17
ILMN_1678493	CHN1	brown	0.505423	8.67e-13
ILMN_1677719	CHST1	brown	-0.547761	2.28e-15
ILMN_1683065	COA5	brown	0.51801	1.01e-13
ILMN_2300396	COMMD5	brown	-0.538805	1.33e-14
ILMN_3237665	COX7A2L	brown	0.569469	6.33e-17
ILMN_1761797	CSTB	brown	-0.577069	4.44e-17
ILMN_2337928	CXCR5	brown	0.556785	1.25e-15
ILMN_2355462	CYFIP1	brown	-0.438145	1.14e-09
ILMN_1809384	CYP4F12	brown	-0.525308	3.41e-14
ILMN_2377459	CYTH2	brown	-0.506922	9.84e-13
ILMN_1726839	DCUN1D5	brown	0.514043	3.28e-13
ILMN_1737580	DESI1	brown	-0.519139	6.04e-14
ILMN_2090123	DHX29	brown	0.566637	3.22e-16
ILMN_1770127	DNAJA2	brown	0.533888	0.998419
ILMN_1782551	E2F5	brown	0.388767	8.12e-08
ILMN_3202002	ECRP	brown	-0.397091	5.46e-08
ILMN_1735151	EIF5A2	brown	0.558781	9.19e-16
ILMN_1764873	ELAVL1	brown	0.539795	2.23e-12
ILMN_1722583	EMC8	brown	0.483441	1.24e-11
ILMN_1781761	ENPP4	brown	0.563593	7.24e-16
ILMN_1724376	ERLEC1	brown	0.59166	1.64e-17
ILMN_1665510	ERRFI1	brown	0.508952	5.92e-13
ILMN_1758034	ETFDH	brown	0.503109	1.01e-12
ILMN_1769092	EVA1B	brown	-0.566758	6.96e-17
ILMN_1727041	EWSR1	brown	0.559313	6.63e-16
ILMN_1851547	FAM120C	brown	0.580407	2.16e-17
ILMN_2096604	FAM192A	brown	-0.593986	2.69e-18
ILMN_1654630	FAM193B	brown	-0.526694	1.72e-14
ILMN_1750160	FASTKD3	brown	0.503526	7.69e-13
ILMN_2285112	FBXO11	brown	0.502171	7.39e-13
ILMN_2045911	FBXO28	brown	0.304037	3.26e-05
ILMN_1703558	FHL3	brown	-0.578742	1.34e-17
ILMN_1747223	FRYL	brown	0.548494	3.06e-15
ILMN_1703408	FZD3	brown	0.416084	1.12e-08
ILMN_1673682	GATAD2A	brown	-0.576073	2.55e-17
ILMN_1813688	GKN2	brown	-0.423947	3.6e-09
ILMN_1766637	GLA	brown	-0.427272	4.68e-09
ILMN_1677962	GPHN	brown	0.468152	3.6e-11
ILMN_1669617	GRB10	brown	-0.422496	4.55e-09
ILMN_1753719	GTF2A2	brown	0.574191	4.96e-21
ILMN_1721136	H6PD	brown	-0.451643	3.16e-08
ILMN_1785574	HTRA2	brown	-0.505288	8.64e-13
ILMN_1733956	IARS	brown	0.553185	2.26e-15
ILMN_1669927	ICOS	brown	0.548812	3.09e-15
ILMN_1793990	ID2	brown	0.546776	3.94e-15
ILMN_1769883	IDE	brown	0.524281	3.15e-14
ILMN_1715603	IL23A	brown	0.515719	1.46e-13
ILMN_1723117	IPO9	brown	0.452253	4.09e-10
ILMN_2316104	IQCB1	brown	0.587572	5.38e-18
ILMN_1798458	KAZN	brown	-0.596825	1.01e-18
ILMN_1668586	KCND1	brown	-0.414924	7.44e-09
ILMN_1653612	KCTD9	brown	0.557407	3.16e-15
ILMN_1681249	KIF21A	brown	0.529149	7e-14
ILMN_1756525	KLHL20	brown	0.504752	4.05e-08
ILMN_1799134	KLRD1	brown	0.49953	0.000304334
ILMN_1721868	KPNA2	brown	0.55304	8.18e-16
ILMN_1708009	LANCL2	brown	0.542282	2.65e-15
ILMN_1694243	LILRA6	brown	-0.52018	1.4e-13
ILMN_1733103	LINC00174	brown	-0.46591	1.26e-24
ILMN_2126706	LMNB1	brown	-0.369986	1.8e-09
ILMN_1795467	LOC399715	brown	-0.581539	1.02e-17
ILMN_1796335	LPCAT2	brown	-0.545992	2.34e-15
ILMN_1747251	LTB4R	brown	-0.587784	3.42e-18
ILMN_1714159	LUZP1	brown	0.552791	2.47e-15
ILMN_1815705	LZTFL1	brown	0.589077	1.55e-17
ILMN_1777564	MAD2L1	brown	0.500959	0.251241
ILMN_1810176	MAP3K7	brown	0.47956	2.93e-11
ILMN_2408908	MAP4K5	brown	0.449633	1.83e-10
ILMN_1764082	MBOAT1	brown	-0.586804	7.84e-18
ILMN_1761808	MCFD2	brown	0.55305	9.89e-16
ILMN_1764383	MCOLN1	brown	-0.440617	0.250677
ILMN_3241441	MEGF6	brown	-0.501441	1.71e-12
ILMN_2205896	MEIS3P1	brown	0.538872	3.47e-15
ILMN_1710209	MFSD6	brown	0.571462	7.66e-17
ILMN_1807972	MICAL1	brown	-0.594231	1.05e-18
ILMN_1915188	MID2	brown	0.571013	6.99e-23
ILMN_3308813	MIR599	brown	0.471124	3.27e-11
ILMN_1742578	MKLN1	brown	0.46685	4.62e-11
ILMN_1679995	MPP6	brown	0.587812	1.07e-17
ILMN_1726391	MRPL39	brown	0.436731	1.36e-09
ILMN_1776939	MS4A1	brown	0.494267	9.5e-13
ILMN_1765520	MTIF2	brown	0.479019	8.26e-12
ILMN_1743836	MXRA7	brown	0.458266	1.21e-10
ILMN_1727080	MYO6	brown	0.495789	3.35e-10
ILMN_2180606	NAA50	brown	0.491413	1.18e-12
ILMN_1809931	NDRG1	brown	-0.432984	7.87e-10
ILMN_3238269	NDUFA6	brown	0.591651	7.97e-18
ILMN_1727618	NDUFAF6	brown	0.593669	6.17e-18
ILMN_1680129	NSUN2	brown	0.588754	1.21e-17
ILMN_1669635	NUP85	brown	0.47553	4.21e-11
ILMN_1669497	OSBPL10	brown	0.470401	2.31e-11
ILMN_2328378	OSBPL3	brown	0.566857	2.76e-16
ILMN_1779280	OTUD3	brown	0.456821	2.35e-10
ILMN_1775448	PFN2	brown	0.447878	0.438649
ILMN_1693620	PGM3	brown	0.586705	1.37e-17
ILMN_1790533	PHACTR2	brown	0.415098	4.54e-09
ILMN_1736548	PHACTR4	brown	0.550772	9.46e-16
ILMN_1723632	PIGC	brown	0.596448	2.82e-18
ILMN_1696270	PLAG1	brown	0.525468	3.15e-14
ILMN_1736929	PLB1	brown	-0.449427	3.36e-10
ILMN_1695827	PPP1CA	brown	-0.591584	1.11e-18
ILMN_2321485	PPP1R8	brown	0.486802	9.44e-12
ILMN_2124082	PPP2R5B	brown	-0.442716	3.09e-10
ILMN_1666761	PPP2R5E	brown	0.537987	1.51e-14
ILMN_3300744	PRELID1	brown	-0.563624	7.64e-16
ILMN_1780898	PRKCH	brown	0.551276	8.03e-15
ILMN_1758474	PRKRA	brown	0.581149	6.69e-36
ILMN_2275583	PRORSD1P	brown	0.546307	3.77e-15
ILMN_2359710	PTP4A3	brown	-0.581608	7.22e-18
ILMN_1740716	RBM26	brown	0.51192	2.21e-13
ILMN_1813766	RCL1	brown	0.484011	1.54e-11
ILMN_1730628	RNASE2	brown	-0.481457	1.53e-11
ILMN_2400143	RPL32	brown	0.576052	4.93e-17
ILMN_1680386	RPP38	brown	0.461437	5.75e-11
ILMN_2262901	RUFY3	brown	0.488685	2.55e-12
ILMN_1795139	S100Z	brown	-0.480561	2.42e-11
ILMN_1672591	SCN9A	brown	-0.445748	4.13e-10
ILMN_1696065	SDF4	brown	-0.549935	4.47e-16
ILMN_1736481	SECISBP2	brown	0.433989	1.08e-09
ILMN_1767337	SFXN5	brown	-0.456168	0.054937
ILMN_1666512	SKIV2L	brown	-0.596445	1.24e-18
ILMN_1732489	SLC10A7	brown	0.382941	2.13e-07
ILMN_1675391	SLC24A4	brown	-0.529237	1.62e-14
ILMN_2082324	SLC36A4	brown	0.503117	2.1e-10
ILMN_1694603	SMARCC1	brown	0.57968	3.62e-17
ILMN_3227023	SNHG7	brown	0.530015	2.99e-14
ILMN_3247939	SNORA23	brown	-0.481025	9.33e-12
ILMN_3234756	SNORD6	brown	0.48004	9.04e-12
ILMN_3246353	SNORD65	brown	0.58014	2.76e-17
ILMN_3247064	SNRNP40	brown	0.433936	2.66e-11
ILMN_1762308	SNX29	brown	0.427303	1.63e-09
ILMN_1757845	SPIRE1	brown	0.511976	5.25e-13
ILMN_3235657	SRGAP2B	brown	-0.555354	2.26e-15
ILMN_1666306	SRRD	brown	0.530714	1.23e-14
ILMN_1783226	SSR2	brown	0.487798	1.71e-12
ILMN_3285959	ST13	brown	0.567291	1.41e-16
ILMN_1651692	STK10	brown	-0.53517	1.37e-14
ILMN_1707326	TASP1	brown	0.469645	3.2e-08
ILMN_1808846	TBKBP1	brown	-0.553963	3.38e-16
ILMN_1811624	THADA	brown	0.508278	4.68e-06
ILMN_2108339	THUMPD1	brown	0.567856	5.52e-17
ILMN_2358560	TIAM2	brown	-0.531176	2.13e-14
ILMN_1803995	TM7SF3	brown	-0.466923	3.18e-11
ILMN_1705213	TMBIM1	brown	-0.529291	4.35e-14
ILMN_1654516	TMEM120A	brown	-0.423327	1.45e-23
ILMN_1700202	TMEM135	brown	0.446237	8.97e-10
ILMN_1752935	TMEM30B	brown	0.48042	1.07e-11
ILMN_1741371	TMEM8A	brown	-0.572781	2.97e-23
ILMN_1659257	TNFRSF8	brown	-0.523565	3.88e-14
ILMN_1683700	TNFSF12	brown	-0.494406	1e-12
ILMN_1667893	TNS3	brown	-0.356964	1.01e-06
ILMN_1788886	TOX	brown	0.547952	5.79e-15
ILMN_1758250	TRAFD1	brown	-0.517986	1.95e-39
ILMN_1673275	TRAPPC2	brown	0.593457	4.56e-07
ILMN_2372639	TRAPPC5	brown	-0.567178	2.16e-16
ILMN_1682316	TRIM33	brown	0.578904	4.04e-17
ILMN_1704383	TRIM37	brown	0.465846	3.93e-11
ILMN_1706265	TRIM61	brown	0.443407	6.61e-10
ILMN_2097954	TSFM	brown	0.474593	4e-09
ILMN_1655611	TSHZ2	brown	0.494132	2.89e-12
ILMN_1790549	TSPAN3	brown	0.454883	1.49e-10
ILMN_1775761	TSR1	brown	0.46801	3.09e-11
ILMN_1696757	TTC14	brown	0.405539	8.97e-15
ILMN_1728605	TTC3	brown	0.52402	2.7e-07
ILMN_1795911	TTC37	brown	0.567134	3.57e-16
ILMN_1652464	TUBA3E	brown	-0.464241	7.33e-11
ILMN_1696110	TUBGCP3	brown	0.461803	8.55e-11
ILMN_1651872	UBIAD1	brown	0.511832	1.38e-13
ILMN_1784410	UBP1	brown	0.571542	1.56e-16
ILMN_3242462	UHRF1BP1	brown	0.58192	4.02e-18
ILMN_3249406	URB2	brown	0.545405	1.09e-14
ILMN_1690524	VAMP7	brown	0.501418	2.05e-12
ILMN_1717334	VAV1	brown	-0.567623	9.66e-17
ILMN_1778561	WEE1	brown	0.534952	3.55e-14
ILMN_1778575	WNT7A	brown	0.543155	7.22e-12
ILMN_2104106	XPR1	brown	0.482776	5.58e-12
ILMN_1691395	ZBTB11	brown	0.541838	1.72e-15
ILMN_1766247	ZBTB2	brown	0.479841	8.67e-12
ILMN_1699440	ZBTB47	brown	-0.46546	4.17e-11
ILMN_1766896	ZDHHC19	brown	-0.499591	1.26e-12
ILMN_2402558	ZHX1	brown	0.501184	8.95e-13
ILMN_1720027	ZNF23	brown	0.559144	5.79e-16
ILMN_2061310	ZNF280C	brown	0.510998	1.85e-13
ILMN_2124816	ZNF34	brown	0.505518	1.99e-12
ILMN_2278653	ZNF493	brown	0.483305	6.97e-12
ILMN_1675479	ZNF646	brown	-0.54764	8.26e-16
ILMN_1795922	ZNF830	brown	0.424369	4.31e-09
ILMN_1786396	ZZEF1	brown	-0.584366	5.49e-18
cyan
substanceBXH	geneSymbol	moduleColor	ModuleMembership	MMPvalue
ILMN_1812759	GCH1	cyan	0.85708	1.41e-52
ILMN_1729987	SRC	cyan	0.889343	1.03e-61
ILMN_2129161	LRRC32	cyan	0.906918	5.62e-68
ILMN_1663042	SDC4	cyan	0.855381	3.69e-52
ILMN_1813846	P2RX4	cyan	0.893742	3.56e-63
ILMN_1769546	RIN2	cyan	0.900424	1.58e-65
ILMN_1789001	SLC35B2	cyan	0.81959	1.96e-44
ILMN_1729314	PRG2	cyan	0.884214	4.41e-60
ILMN_1657234	CCL20	cyan	0.932588	8.27e-80
ILMN_1776967	DNAAF1	cyan	0.945362	1.36e-87
ILMN_2338038	AK4	cyan	0.928936	7.3e-78
ILMN_1789638	MFSD2A	cyan	0.91436	5.14e-71
ILMN_1811171	GPR132	cyan	0.803347	1.79e-41
ILMN_1803686	ADA	cyan	0.849857	7.74e-51
ILMN_1701514	TRAF3IP2	cyan	0.818355	3.37e-44
ILMN_1669122	SERPINB9P1	cyan	0.935993	1.01e-81
ILMN_1654398	RGL1	cyan	0.788629	5.08e-39
ILMN_2357134	SPHK1	cyan	0.792553	1.18e-39
ILMN_1699651	IL6	cyan	0.923238	5.02e-75
ILMN_2161746	TRIP10	cyan	0.909257	6.65e-69
ILMN_1763207	BATF3	cyan	0.919819	1.99e-73
ILMN_2274306	NRP2	cyan	0.81822	3.58e-44
ILMN_1778321	SLC2A6	cyan	0.81621	8.56e-44
ILMN_1718303	PVRL2	cyan	0.741962	2.22e-32
ILMN_1729188	HAMP	cyan	0.883785	5.99e-60
ILMN_1796349	SMPDL3A	cyan	0.833729	2.9e-47
ILMN_1708101	LMNB2	cyan	0.778781	1.74e-37
ILMN_1669376	DRAM1	cyan	0.861388	1.17e-53
ILMN_1682636	CXCL2	cyan	0.834462	2.03e-47
ILMN_1657836	PLEKHG2	cyan	0.712379	7.19e-29
ILMN_1720048	CCL2	cyan	0.845179	9.27e-50
ILMN_1697088	ARMC5	cyan	0.679961	1.69e-25
ILMN_1792506	PLA1A	cyan	0.820321	1.42e-44
ILMN_1910334	KCNJ2-AS1	cyan	0.768489	5.79e-36
ILMN_1718960	SERPINB8	cyan	0.670463	1.36e-24
ILMN_1689378	CCRN4L	cyan	0.631675	3.27e-21
ILMN_1677402	C11orf96	cyan	0.764713	2e-35
ILMN_1674563	CCL4	cyan	0.766296	1.19e-35
ILMN_1769129	CCL19	cyan	0.721908	5.96e-30
ILMN_1658483	IL1A	cyan	0.81759	4.71e-44
ILMN_1664978	TJP2	cyan	0.655775	2.97e-23
ILMN_1708248	LILRB1	cyan	0.665143	4.25e-24
ILMN_1801842	PTX3	cyan	0.633223	2.45e-21
ILMN_2186137	RRAD	cyan	0.649568	1.04e-22
ILMN_1774287	CFB	cyan	0.718265	1.56e-29
ILMN_1808707	FSCN1	cyan	0.783162	3.7e-38
ILMN_1772466	SH2D3A	cyan	0.681488	1.2e-25
ILMN_1799600	STARD8	cyan	0.599294	2.98e-16
green
substanceBXH	geneSymbol	moduleColor	ModuleMembership	MMPvalue
ILMN_1688959	CD27	green	0.736221	1.16e-31
ILMN_1700432	ITPKB	green	0.772534	1.49e-36
ILMN_1793743	DIRC2	green	-0.711524	8.94e-29
ILMN_1745021	SLC30A1	green	-0.775804	4.89e-37
ILMN_1684054	ASAH1	green	-0.753638	6.68e-34
ILMN_2160005	NUMA1	green	0.778599	1.85e-37
ILMN_1773780	FAM173A	green	0.793297	8.9e-40
ILMN_1752269	ACSS1	green	0.775805	4.89e-37
ILMN_2049536	TRPV2	green	0.825201	1.58e-45
ILMN_1780397	TRAF3IP3	green	0.70396	5.97e-28
ILMN_1775542	FAIM3	green	0.691429	1.22e-26
ILMN_1684210	NIPAL3	green	0.757351	2.1e-34
ILMN_1693538	STK36	green	0.717859	1.74e-29
ILMN_1704195	FUK	green	0.691155	1.3e-26
ILMN_1810229	ARID4A	green	-0.792011	1.45e-39
ILMN_1795893	TMEM167B	green	-0.781989	5.62e-38
ILMN_1703335	LACTB	green	-0.776201	4.26e-37
ILMN_1765371	LUC7L	green	0.682669	9.17e-26
ILMN_2377109	LCK	green	0.743543	1.4e-32
ILMN_1710207	FAM178A	green	0.779375	1.41e-37
ILMN_2134110	SELK	green	-0.811909	5.35e-43
ILMN_1751958	NSUN5	green	0.817721	4.45e-44
ILMN_1777519	ITGB7	green	0.775472	5.48e-37
ILMN_1657495	MLEC	green	0.747557	4.24e-33
ILMN_1738239	RBM6	green	0.772369	1.58e-36
ILMN_1693664	POMGNT1	green	0.763311	3.15e-35
ILMN_1810992	CAD	green	0.764587	2.09e-35
ILMN_1669484	WDR6	green	0.882877	1.14e-59
ILMN_1810418	LBR	green	-0.716074	2.77e-29
ILMN_1680831	BAZ1B	green	0.772594	1.46e-36
ILMN_2341793	CCT7	green	0.803319	1.81e-41
ILMN_1671494	USP5	green	0.904481	4.89e-67
ILMN_2387090	CGGBP1	green	-0.765155	1.73e-35
ILMN_1692473	PRMT1	green	0.745588	7.63e-33
ILMN_1787628	NOP56	green	0.779351	1.43e-37
ILMN_1735827	NISCH	green	0.805142	8.7e-42
ILMN_1809040	LDLRAP1	green	0.803262	1.85e-41
ILMN_1789349	UBQLN4	green	0.833329	3.51e-47
ILMN_2375319	RASGRP2	green	0.623017	1.6e-20
ILMN_1690822	VAPA	green	-0.756773	2.52e-34
ILMN_1673798	PPOX	green	0.747073	4.9e-33
ILMN_1692664	PRR5	green	0.817541	4.81e-44
ILMN_1674236	HSPB1	green	0.690322	1.58e-26
ILMN_2336109	L3MBTL2	green	0.854779	5.18e-52
ILMN_1663667	FLAD1	green	0.80427	1.24e-41
ILMN_1666206	GSDMB	green	0.672752	8.3e-25
ILMN_1742432	NELFB	green	0.858446	6.46e-53
ILMN_1741176	CHMP2B	green	-0.831062	1.04e-46
ILMN_1718734	MLLT6	green	0.641789	4.79e-22
ILMN_2061950	RABGAP1	green	0.790673	2.38e-39
ILMN_3239435	HTT	green	0.847282	3.07e-50
ILMN_1780698	ZFYVE19	green	0.827691	5.04e-46
ILMN_1728626	WDR5	green	0.860155	2.4e-53
ILMN_1815012	EXOC7	green	0.847385	2.9e-50
ILMN_1748831	PPP1R13B	green	0.697116	3.16e-27
ILMN_1693771	ASPH	green	-0.730413	5.91e-31
ILMN_1672417	PTPRCAP	green	0.854673	5.5e-52
ILMN_1696601	VARS	green	0.729697	7.2e-31
ILMN_1760441	MRPS5	green	0.7601	8.83e-35
ILMN_1794213	ABHD14A	green	0.816962	6.18e-44
ILMN_1790953	TBCB	green	0.788526	5.28e-39
ILMN_1750395	MBD2	green	-0.772091	1.73e-36
ILMN_1774836	PLOD3	green	0.700866	1.28e-27
ILMN_1696375	TTC31	green	0.77234	1.59e-36
ILMN_1804476	GMPPA	green	0.799382	8.59e-41
ILMN_1736752	COMTD1	green	0.721515	6.62e-30
ILMN_2095133	SPTAN1	green	0.824556	2.12e-45
ILMN_1698491	MBD3	green	0.799004	9.95e-41
ILMN_1668514	PIP5K1C	green	0.789521	3.66e-39
ILMN_1784218	DDX23	green	0.762815	3.7e-35
ILMN_1743747	RUSC1	green	0.678816	2.18e-25
ILMN_1795285	JADE2	green	0.858331	6.9e-53
ILMN_1765649	IRF3	green	0.836721	6.74e-48
ILMN_1793712	SCAMP3	green	0.770216	3.26e-36
ILMN_1795428	WDR59	green	0.661042	1e-23
ILMN_2206272	D2HGDH	green	0.772874	1.33e-36
ILMN_1698777	ADCK1	green	0.705746	3.83e-28
ILMN_2338323	CDC25B	green	0.867814	2.4e-55
ILMN_1656316	ZMYM3	green	0.744577	1.03e-32
ILMN_3247802	PRRC2B	green	0.774984	6.48e-37
ILMN_1679614	SGSM3	green	0.713625	5.22e-29
ILMN_1681437	DCXR	green	0.746353	6.07e-33
ILMN_2282077	MIB2	green	0.766851	9.94e-36
ILMN_2326997	DHPS	green	0.851659	2.91e-51
ILMN_1760049	SERGEF	green	0.709247	1.59e-28
ILMN_1658016	ZNF831	green	0.657632	2.03e-23
ILMN_1657949	RHEB	green	-0.654388	3.94e-23
ILMN_1770977	TMEM134	green	0.695362	4.81e-27
ILMN_1713605	RPAP1	green	0.650341	8.9e-23
ILMN_1784467	NUP210	green	0.871358	2.59e-56
ILMN_1687430	EIF2B4	green	0.817686	4.51e-44
ILMN_1806010	CUL9	green	0.698519	2.25e-27
ILMN_1805161	LZTR1	green	0.769156	4.64e-36
ILMN_1745110	LAPTM4A	green	-0.726174	1.89e-30
ILMN_1742166	GRWD1	green	0.795093	4.5e-40
ILMN_2050255	UCKL1	green	0.824005	2.73e-45
ILMN_1737344	DDX41	green	0.6582	1.81e-23
ILMN_1652580	POLD1	green	0.772537	1.49e-36
ILMN_2358069	MAD1L1	green	0.661345	9.42e-24
ILMN_1668185	ZNF282	green	0.670293	1.41e-24
ILMN_1705447	AFG3L1P	green	0.616941	4.75e-20
ILMN_1709114	TAB1	green	0.667782	2.42e-24
ILMN_1795400	TBCD	green	0.840125	1.24e-48
ILMN_1793201	HAGHL	green	0.623324	1.52e-20
ILMN_1714700	TRIB2	green	0.691407	1.22e-26
ILMN_1803779	AP2A2	green	0.668085	2.27e-24
ILMN_2212714	TMEM39B	green	0.661612	8.91e-24
ILMN_1808356	FAM3A	green	0.792831	1.06e-39
ILMN_3245066	DENND4B	green	0.826867	7.37e-46
ILMN_1690040	TM7SF2	green	0.719588	1.1e-29
ILMN_1741881	C9orf72	green	-0.727425	1.34e-30
ILMN_2118864	RAB1A	green	-0.702418	8.72e-28
ILMN_1788315	SIN3B	green	0.80114	4.3e-41
ILMN_3236049	SNORD12	green	-0.645066	2.53e-22
ILMN_1752249	PIEZO1	green	0.871088	3.08e-56
ILMN_1794132	NDUFS8	green	0.672913	8.01e-25
ILMN_2365091	FCAR	green	-0.758702	1.38e-34
ILMN_1806937	BABAM1	green	0.825939	1.13e-45
ILMN_1750785	SYTL1	green	0.697593	2.82e-27
ILMN_1815169	MCM5	green	0.682192	1.02e-25
ILMN_1757370	SMPD1	green	0.697196	3.1e-27
ILMN_1762316	CPSF3L	green	0.696069	4.06e-27
ILMN_1711853	MED24	green	0.829484	2.18e-46
ILMN_1701731	AKR1B1	green	0.679868	1.72e-25
ILMN_1788818	TET2	green	-0.644504	2.82e-22
ILMN_1714216	TSC2	green	0.638887	8.37e-22
ILMN_1672461	SPPL2B	green	0.655769	2.97e-23
ILMN_2411794	PTPRA	green	0.759595	1.04e-34
ILMN_1801348	GOT2	green	0.762304	4.36e-35
ILMN_1786718	NDUFV1	green	0.64602	2.1e-22
ILMN_1692575	SFSWAP	green	0.603899	4.53e-19
ILMN_1726659	THOP1	green	0.816283	8.3e-44
ILMN_1740385	CEP164	green	0.669609	1.64e-24
ILMN_1694504	RNF220	green	0.604889	3.83e-19
ILMN_1693438	FBXL12	green	-0.642886	3.87e-22
ILMN_1719158	CTBP1	green	0.813261	3.02e-43
ILMN_2384405	RTBDN	green	0.618537	3.58e-20
ILMN_1789510	STIP1	green	0.634869	1.8e-21
ILMN_1675577	TRMT61A	green	0.653278	4.93e-23
ILMN_2092756	TMEM109	green	0.773669	1.02e-36
ILMN_1674160	BIN1	green	0.652789	5.44e-23
ILMN_1783231	PLEKHB1	green	0.62188	1.97e-20
ILMN_1785179	UBE2G2	green	0.655065	3.43e-23
ILMN_2339028	PKD1	green	0.70361	6.51e-28
ILMN_2275803	LRRC45	green	0.784474	2.31e-38
ILMN_1732080	SUMO1P3	green	-0.697735	2.72e-27
ILMN_1802646	EPHB6	green	0.672036	9.7e-25
ILMN_1665943	MAP4K1	green	0.773345	1.13e-36
ILMN_1808395	ACAP1	green	0.732058	3.74e-31
ILMN_1681118	CAPRIN2	green	0.637084	1.18e-21
ILMN_1655961	SND1-IT1	green	0.631057	3.67e-21
ILMN_1658902	DEAF1	green	0.69253	9.41e-27
ILMN_3188110	C19orf60	green	0.851543	3.1e-51
ILMN_2115633	CD320	green	0.674445	5.73e-25
ILMN_1655684	SARS2	green	0.720694	8.23e-30
ILMN_2415179	CLSTN1	green	0.830549	1.32e-46
ILMN_3300313	P4HTM	green	0.674488	5.68e-25
ILMN_1705602	KLHL17	green	0.706638	3.07e-28
ILMN_1699603	MRPL12	green	0.656089	2.79e-23
ILMN_1806122	CHD8	green	0.641578	4.98e-22
ILMN_1683082	RPUSD1	green	0.679863	1.73e-25
ILMN_1782751	GLI4	green	0.645708	2.23e-22
ILMN_1762835	HELZ	green	0.731054	4.95e-31
ILMN_1805636	PGAP3	green	0.61533	6.31e-20
ILMN_1719756	ZAP70	green	0.796536	2.59e-40
ILMN_1729533	APOA1BP	green	0.685015	5.38e-26
ILMN_2394250	PLEKHA1	green	0.607112	2.62e-19
ILMN_1678052	C19orf24	green	0.629776	4.65e-21
ILMN_2158336	SH3GLB2	green	0.611851	1.16e-19
ILMN_1815043	MRPS2	green	0.641596	4.97e-22
ILMN_1774990	C16orf13	green	0.628355	6.05e-21
ILMN_1661337	SRM	green	0.623428	1.49e-20
ILMN_1802089	SYMPK	green	0.608322	2.13e-19
ILMN_1807981	SIGIRR	green	0.863901	2.62e-54
ILMN_3237981	CARNS1	green	0.703655	6.43e-28
ILMN_1794677	TMC6	green	0.707519	2.46e-28
ILMN_2059211	KIAA0195	green	0.688027	2.69e-26
ILMN_1684051	WASF2	green	0.692597	9.26e-27
ILMN_1706273	MOB2	green	0.619532	3e-20
ILMN_1765001	NAT6	green	0.713094	5.98e-29
ILMN_1784037	ZBTB40	green	0.606947	2.7e-19
ILMN_2321416	DIAPH1	green	0.649914	9.69e-23
ILMN_1701940	FAM73B	green	0.747795	3.95e-33
ILMN_1666713	LYPLA1	green	-0.626335	8.77e-21
ILMN_1761138	C9orf142	green	0.679344	1.94e-25
ILMN_1720542	POLR2I	green	0.601496	6.78e-19
ILMN_1774547	MPRIP	green	0.717187	2.07e-29
ILMN_1723177	ANAPC5	green	0.735791	1.31e-31
ILMN_1736112	ARHGAP10	green	0.599019	5.66e-18
ILMN_2370464	ATRIP	green	0.582968	1.07e-16
ILMN_1675612	BLCAP	green	0.571565	2.56e-16
ILMN_1744725	BTBD6	green	0.560148	4.74e-20
ILMN_1670263	CNST	green	0.529727	3.92e-14
ILMN_1746257	DAZAP1	green	0.595247	6.11e-10
ILMN_1756469	GAMT	green	0.534923	6.99e-11
ILMN_1715024	LSS	green	0.593687	1.01e-16
ILMN_1805395	LTBP3	green	0.585882	2.54e-32
ILMN_2044471	NCR3	green	0.588776	5.62e-16
ILMN_1724148	ORAI1	green	0.554495	2.14e-15
ILMN_1728199	POLE	green	0.590834	1.08e-20
ILMN_1760628	RABL6	green	0.587894	2.43e-26
ILMN_1805007	SEMA4F	green	0.585267	7.28e-16
ILMN_1713884	TSR3	green	0.557398	1.83e-13
ILMN_1675721	UBE2R2	green	-0.551742	1.97e-12
ILMN_1799024	VAC14	green	0.59838	7.16e-18
ILMN_1756146	WDR45	green	0.55289	2.81e-16
ILMN_1741300	ZNF407	green	0.560667	5.19e-05
ILMN_3300358	ZNF84	green	0.55726	5.22e-08
ILMN_1788283	COTL1	green	-0.395223	4.77e-08
ILMN_1729691	SLC16A6	green	-0.47998	1.21e-11
ILMN_1792389	RNF165	green	0.301511	4.32e-05
ILMN_1716445	DTYMK	green	-0.0757285	0.315056
ILMN_2387636	EIF6	green	-0.475012	2.09e-11
ILMN_3278995	RBM39	green	-0.609896	1.63e-19
ILMN_1683231	FAM83F	green	-0.38263	1.36e-07
greenyellow
substanceBXH	geneSymbol	moduleColor	ModuleMembership	MMPvalue
ILMN_1664761	TMEM138	greenyellow	0.799022	9.88e-41
ILMN_1691432	PRDM4	greenyellow	0.810301	1.05e-42
ILMN_1694686	HMGXB3	greenyellow	0.825487	1.39e-45
ILMN_2381841	DDX19B	greenyellow	0.899892	2.47e-65
ILMN_1717809	RNF24	greenyellow	-0.751306	1.37e-33
ILMN_1734542	OVGP1	greenyellow	0.733842	2.27e-31
ILMN_1679382	CCT2	greenyellow	0.793448	8.41e-40
ILMN_1703430	CCDC94	greenyellow	0.712376	7.19e-29
ILMN_1746686	POLR1C	greenyellow	0.7469	5.16e-33
ILMN_1800897	NRD1	greenyellow	-0.751624	1.24e-33
ILMN_1811823	MED25	greenyellow	-0.83177	7.41e-47
ILMN_1679232	KIDINS220	greenyellow	-0.814649	1.67e-43
ILMN_1752895	STX8	greenyellow	0.715962	2.85e-29
ILMN_1664012	CANT1	greenyellow	-0.786546	1.09e-38
ILMN_1790741	RNF126	greenyellow	0.87996	8.69e-59
ILMN_1735658	RTTN	greenyellow	0.805613	7.19e-42
ILMN_1791106	HEATR6	greenyellow	0.694506	5.89e-27
ILMN_1687107	RFWD3	greenyellow	0.659496	1.38e-23
ILMN_1665095	NSMF	greenyellow	0.739033	5.18e-32
ILMN_2205245	GPN2	greenyellow	0.829826	1.86e-46
ILMN_1721636	TSC22D4	greenyellow	-0.831712	7.61e-47
ILMN_1753312	PLXDC2	greenyellow	-0.740106	3.8e-32
ILMN_1729980	RNF216	greenyellow	0.666026	3.52e-24
ILMN_1789384	QSOX2	greenyellow	0.799242	9.07e-41
ILMN_1791147	YPEL3	greenyellow	-0.639676	7.19e-22
ILMN_2192683	DHX37	greenyellow	0.91583	1.19e-71
ILMN_1668960	MID1IP1	greenyellow	-0.849753	8.19e-51
ILMN_1809866	WDR74	greenyellow	0.900004	2.25e-65
ILMN_1743583	MADD	greenyellow	0.785674	1.5e-38
ILMN_1814156	PSMB7	greenyellow	0.757837	1.81e-34
ILMN_1812721	HIP1R	greenyellow	0.7892	4.12e-39
ILMN_1676745	ZNF142	greenyellow	0.687741	2.88e-26
ILMN_1713732	ABL1	greenyellow	0.773865	9.5e-37
ILMN_1717781	VPS11	greenyellow	0.739654	4.33e-32
ILMN_3226276	SEC14L1P1	greenyellow	0.716776	2.31e-29
ILMN_1734290	MAPRE3	greenyellow	-0.67128	1.14e-24
ILMN_1720476	PHF2	greenyellow	-0.66569	3.78e-24
ILMN_1695983	DDX42	greenyellow	0.680481	1.5e-25
ILMN_2156982	IMP4	greenyellow	0.856506	1.96e-52
ILMN_3207233	ANP32B	greenyellow	0.679783	1.76e-25
ILMN_1662340	ZNF358	greenyellow	0.610757	1.4e-19
ILMN_1680757	LRRC26	greenyellow	-0.616956	4.74e-20
ILMN_1680860	LEMD2	greenyellow	0.77883	1.71e-37
ILMN_1781721	DDX31	greenyellow	0.669107	1.82e-24
ILMN_1659206	RARA	greenyellow	-0.669379	1.72e-24
ILMN_1759008	ZNF689	greenyellow	0.679896	1.71e-25
ILMN_1681016	SPNS1	greenyellow	0.748639	3.06e-33
ILMN_1665212	EDC4	greenyellow	0.768659	5.47e-36
ILMN_3245625	RFX7	greenyellow	0.649113	1.14e-22
ILMN_1791884	SNHG11	greenyellow	0.642698	4.01e-22
ILMN_2415235	CSNK1E	greenyellow	0.844413	1.38e-49
ILMN_1687922	RP9	greenyellow	0.843821	1.88e-49
ILMN_2356111	SLC41A3	greenyellow	0.85026	6.23e-51
ILMN_1706825	PKN2	greenyellow	-0.63391	2.15e-21
ILMN_1651405	BRD9	greenyellow	0.767838	7.18e-36
ILMN_1772713	BMS1	greenyellow	0.769211	4.55e-36
ILMN_1774661	SNRPB	greenyellow	0.760409	8e-35
ILMN_1758728	FANCG	greenyellow	0.662067	8.11e-24
ILMN_3235517	ZNF777	greenyellow	0.71351	5.38e-29
ILMN_1769451	ILVBL	greenyellow	0.740618	3.28e-32
ILMN_1776109	ZNF622	greenyellow	0.747748	4e-33
ILMN_1721128	TOMM34	greenyellow	0.68366	7.33e-26
ILMN_1655307	FAM136A	greenyellow	0.7625	4.1e-35
ILMN_1689652	RNMTL1	greenyellow	0.668444	2.1e-24
ILMN_1784661	TMEM2	greenyellow	0.564589	1.16e-15
grey
substanceBXH	geneSymbol	moduleColor	ModuleMembership	MMPvalue
ILMN_1736327	CDC42EP3	grey	-0.685413	4.91e-26
ILMN_1705663	DMXL2	grey	-0.657341	2.16e-23
ILMN_1773485	QKI	grey	-0.648319	1.33e-22
ILMN_1772387	TLR2	grey	-0.644968	2.58e-22
ILMN_1735360	SDAD1	grey	0.611029	1.34e-19
ILMN_3235176	TRABD2A	grey	0.605888	3.23e-19
ILMN_1690125	PDLIM7	grey	-0.645064	2.53e-22
ILMN_1781182	RAB43	grey	-0.702902	7.75e-28
ILMN_1658911	AP3S1	grey	-0.679477	1.88e-25
ILMN_1762972	CHD9	grey	0.627227	7.45e-21
ILMN_2391976	SLC45A4	grey	-0.622169	1.87e-20
ILMN_2097793	ZBTB4	grey	0.69339	7.68e-27
ILMN_1654735	SLCO3A1	grey	-0.624965	1.13e-20
ILMN_2301624	MACF1	grey	0.64433	2.92e-22
ILMN_1793724	TAMM41	grey	0.604017	4.44e-19
ILMN_1673711	HSP90AB1	grey	0.600676	7.78e-19
ILMN_2187727	NOC3L	grey	0.641406	5.15e-22
ILMN_1791388	ZNF787	grey	-0.691871	1.1e-26
ILMN_1760922	GIT2	grey	-0.609938	1.62e-19
ILMN_2252408	CNPY4	grey	0.626463	8.57e-21
ILMN_2381397	HSPD1	grey	0.600497	8.02e-19
ILMN_1708486	CNN2	grey	-0.647775	1.48e-22
ILMN_2205032	MAGEE1	grey	0.627299	7.35e-21
ILMN_2076658	MRPL1	grey	0.615521	6.11e-20
ILMN_1659923	GNAQ	grey	-0.648032	1.41e-22
ILMN_1752947	COPRS	grey	-0.626141	9.09e-21
ILMN_2106725	NCF1B	grey	-0.677857	2.7e-25
ILMN_1671028	THRAP3	grey	-0.679091	2.05e-25
ILMN_1813836	DARS	grey	0.611803	1.17e-19
ILMN_2120965	NPAT	grey	0.637808	1.03e-21
ILMN_1852022	PLIN4	grey	-0.655949	2.87e-23
ILMN_1750052	NOP14	grey	0.697066	3.2e-27
ILMN_1741032	HERC3	grey	-0.609823	1.65e-19
ILMN_1748770	CKAP5	grey	0.618737	3.46e-20
ILMN_2067656	CCND2	grey	0.650168	9.21e-23
ILMN_1733050	SEC31B	grey	0.604301	4.23e-19
ILMN_2354478	CYFIP2	grey	0.62196	1.94e-20
ILMN_1790410	DROSHA	grey	0.67268	8.43e-25
ILMN_1691111	SPATA2L	grey	-0.668317	2.16e-24
ILMN_1707312	NFIL3	grey	-0.611074	1.33e-19
ILMN_2121437	NCL	grey	0.600881	7.52e-19
ILMN_1654778	LSP1	grey	-0.605207	3.63e-19
ILMN_1765208	GLUL	grey	-0.706684	3.03e-28
ILMN_1785424	ABLIM1	grey	0.628341	6.07e-21
ILMN_1766245	SUPT4H1	grey	-0.675479	4.57e-25
ILMN_1800638	CELF2	grey	-0.633799	2.2e-21
ILMN_1801403	DCUN1D4	grey	0.639718	7.13e-22
ILMN_1763386	BID	grey	-0.60245	5.78e-19
ILMN_1792682	MCTP2	grey	-0.613665	8.46e-20
ILMN_1677239	CCDC14	grey	0.705775	3.81e-28
ILMN_1814917	TLE2	grey	0.600464	8.06e-19
ILMN_1688853	ZBTB9	grey	0.614706	7.05e-20
ILMN_1707534	NKRF	grey	0.68059	1.47e-25
ILMN_1657423	SPG21	grey	-0.677813	2.73e-25
ILMN_1658373	PAN2	grey	0.680984	1.34e-25
ILMN_1812191	C12orf57	grey	0.612373	1.06e-19
ILMN_1716465	RBP7	grey	-0.508805	4.12e-13
ILMN_1802611	SPEN	grey	-0.716228	2.66e-29
ILMN_3307616	EPHA10	grey	0.0523805	0.487434
ILMN_2353642	ATP6V0B	grey	-0.486559	5.74e-12
ILMN_3206132	RPS8	grey	0.122556	0.103157
ILMN_2339202	KTN1	grey	0.510332	3.42e-13
ILMN_2059505	ARPP19	grey	0.171862	0.021798
ILMN_3248975	PPP4C	grey	-0.271827	0.000242145
ILMN_1795826	ATP6V0D1	grey	0.0587158	0.436263
ILMN_3280496	RPL26	grey	0.123582	0.100285
ILMN_1788607	RPL23A	grey	0.186421	0.0127198
ILMN_2098446	PMAIP1	grey	0.402663	2.52e-08
ILMN_1712231	SH3YL1	grey	-0.114233	0.128939
ILMN_3178406	KLHL29	grey	0.194983	0.00910308
ILMN_1770020	PPIL3	grey	0.0288972	0.701793
ILMN_1759954	PTMA	grey	0.195129	0.0090503
ILMN_3200717	LOC643387	grey	0.163246	0.0294615
ILMN_1652379	SUCLG2	grey	0.070438	0.350149
ILMN_1803647	FAM162A	grey	0.0133436	0.859682
ILMN_1742798	TRA2B	grey	0.139398	0.0634866
ILMN_3274596	EIF4A2	grey	0.120372	0.109494
ILMN_1675085	UBA6	grey	0.396066	4.44e-08
ILMN_3263329	GAR1	grey	0.0218102	0.772605
ILMN_1679025	RPS3A	grey	0.131918	0.0792111
ILMN_1812312	NDUFS4	grey	0.0674312	0.371148
ILMN_2322806	CAST	grey	0.147111	0.0500483
ILMN_1743352	TBCC	grey	-0.338261	3.87e-06
ILMN_3178792	HNRNPA2B1	grey	-0.0218943	0.771753
ILMN_3230435	VOPP1	grey	0.241114	0.00118625
ILMN_2405233	FAM133B	grey	0.281449	0.000141364
ILMN_3195253	RPL7	grey	0.1004	0.182386
ILMN_1804328	WWP1	grey	-0.0334286	0.657784
ILMN_2215631	OTUD6B	grey	-0.117146	0.119403
ILMN_2145250	NACAP1	grey	0.153222	0.041161
ILMN_3243859	NDUFB9	grey	0.0507416	0.501176
ILMN_3235340	ACER2	grey	0.0265235	0.725261
ILMN_2135175	SNORD36A	grey	0.340462	3.32e-06
ILMN_1750429	MKNK1	grey	0.574484	5.1e-17
ILMN_2134453	FCGR3B	grey	-0.32075	1.27e-05
ILMN_1700610	CLEC7A	grey	0.494655	2.25e-12
ILMN_1758418	TNFSF13B	grey	0.374446	2.62e-07
ILMN_1736256	CALR	grey	-0.497565	1.6e-12
ILMN_3238662	SNORD89	grey	0.528116	3.57e-14
ILMN_1691393	DNPEP	grey	-0.576675	3.64e-17
ILMN_1789751	MFSD1	grey	0.567114	1.55e-16
ILMN_3236428	TMEM170B	grey	0.370443	3.59e-07
ILMN_1738816	FOXO1	grey	0.0358117	0.476357
ILMN_1728180	LUC7L3	grey	0.187751	-0.556654
ILMN_1766195	ZNF558	grey	0.12038	-0.662413
ILMN_1674609	CLTB	grey	-0.512892	2.49e-13
ILMN_2157510	BLOC1S1	grey	0.0622138	0.409379
ILMN_1668910	CIDEB	grey	0.0760819	0.312796
ILMN_2133187	PRSS53	grey	0.376386	2.24e-07
ILMN_1738103	COPE	grey	0.160801	0.0320165
ILMN_1805916	NIPSNAP1	grey	0.338597	3.78e-06
ILMN_1675684	APOBEC3C	grey	0.440825	7.36e-10
ILMN_2195236	PGRMC2	grey	-0.138579	0.0650725
ILMN_2089329	SPRY2	grey	-0.433977	1.43e-09
ILMN_1718129	MAP2K5	grey	0.456944	1.44e-10
ILMN_1746832	CEP290	grey	0.0965315	0.199908
ILMN_1748450	TAL1	grey	-0.0639204	0.396626
ILMN_1729237	CYB5R1	grey	0.019773	0.793343
ILMN_2098013	CETP	grey	-0.0481658	0.523177
ILMN_1712283	WNT10B	grey	0.152352	0.0423384
ILMN_1683658	FKBP1A	grey	0.148596	0.0477531
ILMN_3239735	WASH7P	grey	0.0162122	0.829933
ILMN_1776601	OR4F5	grey	-0.045235	0.548796
ILMN_1789086	LOC100288069	grey	-0.489903	3.91e-12
ILMN_1862963	LINC01128	grey	0.152319	0.0423842
ILMN_2195138	SAMD11	grey	-0.107969	0.151419
ILMN_1711422	PLEKHN1	grey	0.103843	0.167769
ILMN_1784186	PERM1	grey	-0.0813769	0.28021
ILMN_1653466	HES4	grey	-0.105985	0.159123
ILMN_1770454	AGRN	grey	-0.275364	0.000199134
ILMN_1712177	RNF223	grey	0.150005	0.0456585
ILMN_3308380	MIR200B	grey	-0.212977	0.00431362
ILMN_3308803	MIR200A	grey	-0.0560024	0.457794
ILMN_3309133	MIR429	grey	-0.0950685	0.206842
ILMN_1799329	TTLL10	grey	0.0216069	0.774668
ILMN_1743100	TNFRSF18	grey	0.143404	0.0561789
ILMN_2112256	TNFRSF4	grey	0.0651465	0.387611
ILMN_1743847	ACAP3	grey	-0.122529	0.103235
ILMN_1780315	PUSL1	grey	0.135431	0.0714729
ILMN_1681325	CPTP	grey	0.081598	0.278902
ILMN_2108135	TAS1R3	grey	0.0646993	0.390884
ILMN_3236381	MXRA8	grey	-0.0670365	0.373961
ILMN_1768396	AURKAIP1	grey	-0.091183	0.226093
ILMN_2379226	CCNL2	grey	-0.238932	0.00131843
ILMN_3236325	ANKRD65	grey	0.00254807	0.973072
ILMN_1660554	VWA1	grey	-0.0155319	0.836967
ILMN_1780923	ATAD3C	grey	0.0203468	0.787486
ILMN_3241212	ATAD3B	grey	0.244156	0.00102219
ILMN_1738530	ATAD3A	grey	0.408136	1.56e-08
ILMN_1748257	TMEM240	grey	-0.0365087	0.628516
ILMN_1664956	SSU72	grey	-0.122572	0.103114
ILMN_1808107	MMP23B	grey	-0.285141	0.000114388
ILMN_1651209	SLC35E2	grey	-0.100011	0.184096
ILMN_1739162	CALML6	grey	0.0384856	0.610028
ILMN_1668246	TMEM52	grey	0.174753	0.0196452
ILMN_1749317	CFAP74	grey	0.0025645	0.972898
ILMN_1779742	GABRD	grey	0.111949	0.136818
ILMN_1710598	SKI	grey	-0.292176	7.58e-05
ILMN_1655161	MORN1	grey	-0.00903726	0.904701
ILMN_3248132	LOC100129534	grey	-0.0321189	0.670391
ILMN_2061565	PLCH2	grey	0.37483	2.54e-07
ILMN_1794742	HES5	grey	0.0154901	0.8374
ILMN_1718488	MMEL1	grey	0.0606226	0.421485
ILMN_1717406	TTC34	grey	0.0272053	0.718493
ILMN_1776442	ACTRT2	grey	-0.00380761	0.95977
ILMN_1784094	PRDM16	grey	-0.0476524	0.527621
ILMN_1669928	ARHGEF16	grey	0.0349306	0.643443
ILMN_3310668	MIR551A	grey	0.0411902	0.58513
ILMN_1778188	TP73	grey	-0.112822	0.133766
ILMN_2090040	TP73-AS1	grey	0.287409	0.000100285
ILMN_1811167	CCDC27	grey	-0.0996512	0.185688
ILMN_2228453	CEP104	grey	0.230182	0.00199487
ILMN_3228056	LINC01346	grey	-0.0486604	0.518914
ILMN_2312764	AJAP1	grey	-0.198141	0.00801957
ILMN_1808417	NPHP4	grey	0.250444	0.000747068
ILMN_1725496	KCNAB2	grey	-0.0239022	0.751476
ILMN_1698148	CHD5	grey	0.10744	0.153446
ILMN_3237503	RNF207	grey	-0.00763321	0.919452
ILMN_2146495	GPR153	grey	-0.0649734	0.388877
ILMN_2094266	HES2	grey	0.220339	0.00312277
ILMN_1806710	ESPN	grey	0.0318515	0.672977
ILMN_1765109	TNFRSF25	grey	0.494974	2.17e-12
ILMN_1784477	PLEKHG5	grey	-0.0625673	0.406717
ILMN_1805197	TAS1R1	grey	0.136436	0.0693761
ILMN_1761560	PHF13	grey	-0.624514	1.22e-20
ILMN_1766128	THAP3	grey	0.0135719	0.857306
ILMN_1747903	DNAJC11	grey	0.0786652	0.296602
ILMN_1661940	CAMTA1	grey	0.369714	3.79e-07
ILMN_1660986	PER3	grey	0.072666	0.335081
ILMN_1671818	UTS2	grey	-0.00934255	0.901498
ILMN_1813379	TNFRSF9	grey	-0.355519	1.12e-06
ILMN_1744713	PARK7	grey	0.235785	0.0015328
ILMN_2324162	SLC45A1	grey	0.0892312	0.236227
ILMN_1896149	ENO1-AS1	grey	-0.0785155	0.297525
ILMN_1708790	CA6	grey	-0.153221	0.0411623
ILMN_1707370	SLC2A7	grey	-0.124138	0.0987522
ILMN_1671337	SLC2A5	grey	0.0386434	0.608562
ILMN_1654703	GPR157	grey	0.0268457	0.72206
ILMN_3308455	MIR34A	grey	0.0582902	0.439602
ILMN_1714170	SPSB1	grey	0.185901	0.012975
ILMN_1749376	TMEM201	grey	0.229039	0.00210351
ILMN_1794165	PGD	grey	-0.390178	7.29e-08
ILMN_2071186	CORT	grey	-0.142428	0.0578913
ILMN_1727723	MASP2	grey	-0.0366316	0.62736
ILMN_1813361	ANGPTL7	grey	0.113868	0.130174
ILMN_1803211	FBXO2	grey	0.291627	7.83e-05
ILMN_2325625	FBXO44	grey	-9.99e-05	0.998944
ILMN_1734830	MTHFR	grey	0.189193	0.0114307
ILMN_1750386	NPPA	grey	-0.015577	0.836501
ILMN_1763382	NPPB	grey	-0.013819	0.854736
ILMN_1668851	AADACL4	grey	-0.11552	0.124658
ILMN_1660703	AADACL3	grey	-0.171178	0.0223364
ILMN_1733298	C1orf158	grey	-0.00862878	0.908989
ILMN_1809304	PRAMEF12	grey	0.0278195	0.712415
ILMN_2112551	PRAMEF1	grey	0.0697263	0.355051
ILMN_3303518	PRAMEF11	grey	-0.0985389	0.190671
ILMN_2154186	HNRNPCL1	grey	-0.0240251	0.75024
ILMN_3240662	PRAMEF2	grey	0.0759819	0.313435
ILMN_2221769	PRAMEF4	grey	0.0326812	0.664967
ILMN_1672478	PRAMEF8	grey	-0.237372	0.00142104
ILMN_2104821	PRAMEF7	grey	0.0966822	0.199204
ILMN_2045270	PRAMEF6	grey	0.0122898	0.870663
ILMN_3236604	PRAMEF22	grey	0.107527	0.153111
ILMN_2094648	PRAMEF5	grey	0.0201571	0.789421
ILMN_3245015	HNRNPCL2	grey	-0.237576	0.00140717
ILMN_1739685	PRAMEF20	grey	0.0124699	0.868784
ILMN_1735195	PRAMEF10	grey	0.0203572	0.787381
ILMN_1670490	PDPN	grey	-0.0390066	0.605196
ILMN_1691441	TMEM51-AS1	grey	0.00241048	0.974525
ILMN_3236432	FHAD1	grey	-0.0313755	0.67759
ILMN_2202747	CELA2A	grey	-0.0864246	0.251352
ILMN_1688458	CELA2B	grey	-0.0790445	0.294271
ILMN_1786046	CASP9	grey	-0.364967	5.48e-07
ILMN_1717078	DNAJC16	grey	-0.0716301	0.342035
ILMN_1775861	DDI2	grey	-0.0445051	0.555271
ILMN_1709399	SLC25A34	grey	-0.0531106	0.481378
ILMN_1703648	TMEM82	grey	-0.153783	0.0404153
ILMN_2353143	FBLIM1	grey	-0.0680018	0.367105
ILMN_1718136	UQCRHL	grey	0.550707	1.67e-15
ILMN_1679816	HSPB7	grey	0.0537316	0.476259
ILMN_2364072	CLCNKA	grey	-0.138203	0.0658122
ILMN_1798742	CLCNKB	grey	0.0376698	0.617629
ILMN_1761527	FAM131C	grey	-0.122572	0.103112
ILMN_1699354	EPHA2	grey	0.143317	0.0563298
ILMN_1756874	FBXO42	grey	-0.133475	0.0757017
ILMN_1707503	SZRD1	grey	-0.269806	0.000270439
ILMN_1705337	SPATA21	grey	0.084256	0.263488
ILMN_1749011	NECAP2	grey	0.367328	4.57e-07
ILMN_3248462	FAM231B	grey	-0.123719	0.0999039
ILMN_1716353	CROCCP2	grey	0.15855	0.0345314
ILMN_3249001	FAM231C	grey	0.0355171	0.637878
ILMN_1776870	ESPNP	grey	0.029293	0.697907
ILMN_2245087	MFAP2	grey	0.00525731	0.944474
ILMN_1704164	ATP13A2	grey	0.317819	1.54e-05
ILMN_1667257	SDHB	grey	-0.232601	0.00178175
ILMN_3294196	LOC400743	grey	0.0269931	0.720597
ILMN_1732323	PADI1	grey	-0.229906	0.00202061
ILMN_1758888	PADI3	grey	0.216959	0.00362674
ILMN_1807529	PADI4	grey	-0.355607	1.11e-06
ILMN_1748221	PADI6	grey	0.165449	0.027311
ILMN_1689770	ARHGEF10L	grey	0.0593382	0.431407
ILMN_1704078	ACTL8	grey	-0.116479	0.121539
ILMN_1730039	IGSF21	grey	-0.036967	0.624209
ILMN_1754312	KLHDC7A	grey	-0.069523	0.356459
ILMN_1835658	PAX7	grey	0.0443374	0.556763
ILMN_1697141	TAS1R2	grey	-0.0981541	0.192417
ILMN_2153280	EMC1	grey	0.490081	3.83e-12
ILMN_1689800	MRTO4	grey	0.343982	2.59e-06
ILMN_2251664	PQLC2	grey	0.0434611	0.564595
ILMN_1800989	HTR6	grey	-0.0986099	0.19035
ILMN_1781276	TMCO4	grey	0.335428	4.72e-06
ILMN_1811278	RNF186	grey	-0.183519	0.0142039
ILMN_1710590	PLA2G2E	grey	0.144056	0.0550564
ILMN_1740586	PLA2G2A	grey	-0.0439718	0.560024
ILMN_1807171	PLA2G5	grey	0.103795	0.167965
ILMN_1788811	PLA2G2D	grey	-0.0259258	0.731212
ILMN_1724799	PLA2G2F	grey	0.0129244	0.864047
ILMN_3237030	PLA2G2C	grey	0.0745184	0.322874
ILMN_1726798	UBXN10	grey	-0.163871	0.028837
[truncated: 16,546 more rows]

## Sheet: Execl Table S2
Excel Table S2. KEGG pathways and GO biological processes significantly enriched in the co-expressed gene modules
KEGG pathways
Module	ID	Description	GeneRatio	BgRatio	pvalue	p.adjust	qvalue	geneID	Count
blue	hsa04061	Viral protein interaction with cytokine and cytokine receptor	11/196	100/7861	3.56865e-05	0.00432927	0.00374064	8743/1232/7132/8740/4055/3570/3577/1230/3587/2919/3579	11
blue	hsa04012	ErbB signaling pathway	10/196	85/7861	4.54338e-05	0.00432927	0.00374064	818/5594/867/5058/5336/6416/7039/868/1398/6777	10
blue	hsa05120	Epithelial cell signaling in Helicobacter pylori infection	9/196	70/7861	5.41159e-05	0.00432927	0.00374064	5058/5336/6416/523/3577/1432/102/2919/3579	9
brown	hsa05235	PD-L1 expression and PD-1 checkpoint pathway in cancer	9/151	89/7861	4.81373e-05	0.0107346	0.0103369	6198/27436/940/5533/5295/5595/4615/5588/4215	9
cyan	hsa04061	Viral protein interaction with cytokine and cytokine receptor	6/27	100/7861	8.68893e-07	8.9496e-05	6.67676e-05	6364/3569/2920/6347/6351/6363	6
cyan	hsa04657	IL-17 signaling pathway	5/27	93/7861	1.36676e-05	0.000703881	0.000525123	6364/10758/3569/2920/6347	5
cyan	hsa04062	Chemokine signaling pathway	6/27	190/7861	3.57109e-05	0.00114318	0.000852859	6714/6364/2920/6347/6351/6363	6
cyan	hsa04060	Cytokine-cytokine receptor interaction	7/27	294/7861	4.43954e-05	0.00114318	0.000852859	6364/3569/2920/6347/6351/6363/3552	7
cyan	hsa05132	Salmonella infection	4/27	86/7861	0.000193399	0.00398403	0.00297224	3569/2920/6351/3552	4
cyan	hsa05323	Rheumatoid arthritis	4/27	91/7861	0.000240571	0.00412981	0.003081	6364/3569/6347/3552	4
cyan	hsa04668	TNF signaling pathway	4/27	110/7861	0.000497003	0.00731305	0.00545582	6364/3569/2920/6347	4
cyan	hsa05418	Fluid shear stress and atherosclerosis	4/27	139/7861	0.00119769	0.0154203	0.0115041	6714/6385/6347/3552	4
cyan	hsa05152	Tuberculosis	4/27	179/7861	0.00302838	0.0346581	0.0258563	6714/8877/3569/3552	4
cyan	hsa04064	NF-kappa B signaling pathway	3/27	100/7861	0.00468133	0.0438343	0.0327021	2920/6351/6363	3
cyan	hsa04933	AGE-RAGE signaling pathway in diabetic complications	3/27	100/7861	0.00468133	0.0438343	0.0327021	3569/6347/3552	3
turquoise	hsa00310	Lysine degradation	19/799	59/7861	3.00138e-06	0.000936432	0.000846706	2146/58508/83852/55217/84193/84444/224/1738/1743/55904/85007/5351/9869/2639/1892/38/7799/79709/39	19
turquoise	hsa03018	RNA degradation	22/799	79/7861	7.53544e-06	0.00117553	0.00106289	55802/3313/51010/10950/51013/170506/4848/80336/56915/57819/64282/131870/84186/1656/80153/57472/255967/80349/115752/11044/140886/219988	22
turquoise	hsa00510	N-Glycan biosynthesis	15/799	50/7861	8.33293e-05	0.00711119	0.00642982	79796/2683/4247/3703/79053/1798/10195/440138/6480/8813/11320/85365/201595/57171/79868	15
turquoise	hsa04120	Ubiquitin mediated proteolysis	29/799	137/7861	9.11691e-05	0.00711119	0.00642982	55294/7322/118424/9690/7332/330/6500/8925/9063/246184/7337/57154/51366/6477/6502/8453/996/26272/26091/7326/51529/10055/672/83737/7328/89910/9616/8451/55958	29
turquoise	hsa00280	Valine, leucine and isoleucine degradation	14/799	48/7861	0.000199719	0.0124624	0.0112683	34/3157/224/84693/1738/3155/30/11112/549/3032/1892/587/38/39	14
turquoise	hsa03040	Spliceosome	27/799	134/7861	0.000368153	0.019144	0.0173096	3303/27316/9129/23350/3305/1659/8449/6629/6426/51729/9879/57819/22938/4670/23450/10915/10713/84950/988/3304/51362/494115/10772/7307/6432/84321/51645	27
turquoise	hsa03013	RNA transport	31/799	165/7861	0.000508812	0.0226785	0.0205055	53371/9631/10799/4928/11171/11097/6612/80336/10284/1915/9972/8669/59343/10460/138716/10921/348995/5411/8668/51068/10419/26019/8563/51367/79833/8021/10073/140886/29107/10289/84321	31
turquoise	hsa05160	Hepatitis C	29/799	155/7861	0.000817476	0.0309705	0.028003	317/7124/8717/24146/3454/5296/5516/3949/10062/29110/9451/2885/3845/55844/4893/10197/5970/148022/9641/7532/3455/1019/23586/1017/3665/673/49861/5465/6256	29
turquoise	hsa00640	Propanoate metabolism	10/799	32/7861	0.00089338	0.0309705	0.028003	34/55862/55902/84693/1738/23417/1892/38/8802/39	10
turquoise	hsa04623	Cytosolic DNA-sensing pathway	15/799	63/7861	0.00128674	0.0401462	0.0362995	5437/5435/11035/29110/55718/84265/51728/9447/5970/9641/4793/23586/171568/3665/5441	15
GO biological processes
Module	ID	Description	GeneRatio	BgRatio	pvalue	p.adjust	qvalue	geneID	Count
blue	GO:0004896	cytokine receptor activity	11/439	93/17548	2.04395e-05	0.0136944	0.0132964	1232/23765/1438/3570/3577/1230/3587/2057/3597/1439/3579	11
brown	GO:0005525	GTP binding	18/330	371/17548	0.000246577	0.0244374	0.0229365	26354/4976/85476/10123/400/166785/4733/139596/29889/159/56681/53917/84932/10383/51277/29083/5869/4600	18
brown	GO:0004004	ATP-dependent RNA helicase activity	7/330	67/17548	0.000257999	0.0244374	0.0229365	57696/79009/1653/9704/5976/11056/1665	7
brown	GO:0032550	purine ribonucleoside binding	18/330	374/17548	0.00027186	0.0244374	0.0229365	26354/4976/85476/10123/400/166785/4733/139596/29889/159/56681/53917/84932/10383/51277/29083/5869/4600	18
brown	GO:0003724	RNA helicase activity	7/330	68/17548	0.000283037	0.0244374	0.0229365	57696/79009/1653/9704/5976/11056/1665	7
brown	GO:0008186	RNA-dependent ATPase activity	7/330	68/17548	0.000283037	0.0244374	0.0229365	57696/79009/1653/9704/5976/11056/1665	7
brown	GO:0001883	purine nucleoside binding	18/330	377/17548	0.000299373	0.0244374	0.0229365	26354/4976/85476/10123/400/166785/4733/139596/29889/159/56681/53917/84932/10383/51277/29083/5869/4600	18
brown	GO:0032549	ribonucleoside binding	18/330	378/17548	0.000309067	0.0244374	0.0229365	26354/4976/85476/10123/400/166785/4733/139596/29889/159/56681/53917/84932/10383/51277/29083/5869/4600	18
brown	GO:0001882	nucleoside binding	18/330	385/17548	0.00038491	0.0244374	0.0229365	26354/4976/85476/10123/400/166785/4733/139596/29889/159/56681/53917/84932/10383/51277/29083/5869/4600	18
brown	GO:0032561	guanyl ribonucleotide binding	18/330	391/17548	0.000462283	0.0244374	0.0229365	26354/4976/85476/10123/400/166785/4733/139596/29889/159/56681/53917/84932/10383/51277/29083/5869/4600	18
brown	GO:0019001	guanyl nucleotide binding	18/330	392/17548	0.000476407	0.0244374	0.0229365	26354/4976/85476/10123/400/166785/4733/139596/29889/159/56681/53917/84932/10383/51277/29083/5869/4600	18
brown	GO:0008026	ATP-dependent helicase activity	8/330	98/17548	0.000520869	0.0244374	0.0229365	4175/57696/79009/1653/9704/5976/11056/1665	8
brown	GO:0070035	purine NTP-dependent helicase activity	8/330	98/17548	0.000520869	0.0244374	0.0229365	4175/57696/79009/1653/9704/5976/11056/1665	8
brown	GO:0140098	catalytic activity, acting on RNA	17/330	375/17548	0.000783839	0.0339462	0.0318613	5917/2617/60487/5393/55006/246175/10594/64216/11062/57696/79009/51634/1653/9704/5976/11056/1665	17
brown	GO:0004596	peptide alpha-N-acetyltransferase activity	3/330	11/17548	0.000972091	0.0390919	0.0366909	122830/80018/79612	3
cyan	GO:0008009	chemokine activity	5/41	49/17548	9.56361e-08	1.62581e-05	1.17783e-05	6364/2920/6347/6351/6363	5
cyan	GO:0042379	chemokine receptor binding	5/41	66/17548	4.35361e-07	3.70057e-05	2.68091e-05	6364/2920/6347/6351/6363	5
cyan	GO:0005125	cytokine activity	7/41	220/17548	6.92537e-07	3.92438e-05	2.84305e-05	6364/3569/2920/6347/6351/6363/3552	7
cyan	GO:0048020	CCR chemokine receptor binding	4/41	43/17548	2.96273e-06	0.000111968	8.11158e-05	6364/6347/6351/6363	4
cyan	GO:0005126	cytokine receptor binding	7/41	278/17548	3.29316e-06	0.000111968	8.11158e-05	6364/3569/2920/6347/6351/6363/3552	7
cyan	GO:0048018	receptor ligand activity	8/41	472/17548	1.13019e-05	0.000320222	0.000231987	6364/3569/57817/2920/6347/6351/6363/3552	8
cyan	GO:0001664	G-protein coupled receptor binding	5/41	271/17548	0.000402617	0.00977785	0.00708365	6364/2920/6347/6351/6363	5
cyan	GO:0030674	protein binding, bridging	4/41	170/17548	0.000651021	0.0138342	0.0100223	6714/9414/6624/10045	4
cyan	GO:0060090	molecular adaptor activity	4/41	191/17548	0.00100534	0.0184868	0.0133929	6714/9414/6624/10045	4
cyan	GO:0001848	complement binding	2/41	21/17548	0.00108746	0.0184868	0.0133929	5806/629	2
cyan	GO:0019201	nucleotide kinase activity	2/41	25/17548	0.00154435	0.0238672	0.0172908	205/9414	2
cyan	GO:0042169	SH2 domain binding	2/41	33/17548	0.00268612	0.0380534	0.0275681	6714/10859	2
cyan	GO:0016814	hydrolase activity, acting on carbon-nitrogen (but not peptide) bonds, in cyclic amidines	2/41	35/17548	0.00301805	0.0394668	0.0285921	2643/100	2
cyan	GO:0070851	growth factor receptor binding	3/41	133/17548	0.00367662	0.0446446	0.0323432	6714/3569/3552	3
cyan	GO:0016776	phosphotransferase activity, phosphate group as acceptor	2/41	42/17548	0.00432243	0.0489875	0.0354894	205/9414	2
turquoise	GO:0003713	transcription coactivator activity	67/1772	317/17548	3.36243e-09	3.48348e-06	3.11114e-06	133746/9439/8204/6095/9975/1022/10432/7251/4928/51147/3298/11319/9321/4791/10600/8607/7332/8289/9969/9063/11035/10001/6047/7337/84193/6874/10062/1660/22938/4520/9441/1386/79960/56254/2551/4335/6597/3159/51741/10025/10915/10011/2521/26205/25988/7182/4793/6595/6671/473/9325/9603/4149/3275/672/57826/1488/55827/79084/7376/86/93624/5465/8202/10987/8864/6256	67
turquoise	GO:0140098	catalytic activity, acting on RNA	73/1772	375/17548	2.68875e-08	1.39277e-05	1.2439e-05	80745/51110/79665/16/51010/6832/57062/5437/5188/10799/5435/123263/80149/170506/158234/54920/4848/1659/201626/8449/51093/56915/1660/9879/55718/9188/23318/60625/84265/51728/83707/57038/79587/2058/81488/4141/10190/10146/5557/57721/283/56919/51520/2193/5439/51106/1656/138428/25996/114034/51091/51504/64848/5431/79039/5558/80153/81627/57472/171568/255967/115752/11232/339175/51367/117246/5441/10535/5633…	73
turquoise	GO:0044389	ubiquitin-like protein ligase binding	59/1772	323/17548	4.82953e-06	0.0016678	0.00148953	3313/55294/3303/8405/25820/5187/79139/7251/8027/5898/3305/6118/23197/118424/5567/3311/7332/9063/64112/11124/55432/10869/9530/51701/5094/56254/4092/7520/3091/4738/79899/8453/7336/5970/23710/9641/7326/54472/23586/7466/84959/3304/9325/7917/672/83737/387521/53339/57763/596/7328/54737/29089/9618/65992/80196/8451/11200/389161	59
turquoise	GO:0004842	ubiquitin-protein transferase activity	75/1772	446/17548	6.51987e-06	0.00168865	0.00150815	91694/84861/55294/7844/7322/25820/26273/5987/9921/118424/54941/80829/9690/7332/153830/330/6500/8925/130507/6047/7337/10206/84541/57154/51366/26001/81844/6477/400569/10116/5930/6502/152006/56254/8453/7336/84961/6478/197370/26118/26272/25831/26091/115426/26046/7326/26190/51529/80028/57542/672/54708/64777/25897/5828/83737/90850/79786/387521/387921/25948/7328/89910/79872/373/79699/54737/29089/55128/8…	75
turquoise	GO:0019787	ubiquitin-like protein transferase activity	77/1772	472/17548	1.50939e-05	0.00248338	0.00221793	91694/84861/55294/7844/7322/25820/26273/5987/9921/118424/54941/80829/9690/7332/153830/330/6500/8925/9063/130507/6047/7337/10206/84541/57154/51366/26001/81844/6477/400569/10116/5930/6502/152006/56254/8453/7336/84961/6478/197370/26118/26272/25831/26091/115426/26046/7326/26190/51529/80028/57542/672/54708/64777/25897/5828/83737/90850/79786/387521/387921/25948/7328/89910/79872/373/79699/54737/29089/55…	77
turquoise	GO:0008757	S-adenosylmethionine-dependent methyltransferase activity	34/1772	158/17548	1.59028e-05	0.00248338	0.00221793	80745/5110/84661/9070/2146/158234/58508/83852/51093/84193/84444/23463/55904/57721/55471/23378/51106/1312/51504/9869/10419/3275/81627/8726/79084/7799/339175/79609/117246/56339/4839/10196/90826/79091	34
turquoise	GO:0016741	transferase activity, transferring one-carbon groups	44/1772	227/17548	1.67941e-05	0.00248338	0.00221793	80745/5110/84661/51603/9070/79133/123263/2146/158234/58508/83852/84190/51093/84193/84444/84274/23463/25840/55904/57721/55471/23378/51106/1312/8623/51504/9869/10419/3275/81627/8726/2653/79084/7799/339175/79609/117246/56339/4839/2618/10196/90826/79091/645332	44
turquoise	GO:0008168	methyltransferase activity	42/1772	215/17548	2.13085e-05	0.00248338	0.00221793	80745/5110/84661/51603/9070/79133/2146/158234/58508/83852/84190/51093/84193/84444/84274/23463/25840/55904/57721/55471/23378/51106/1312/8623/51504/9869/10419/3275/81627/8726/2653/79084/7799/339175/79609/117246/56339/4839/10196/90826/79091/645332	42
turquoise	GO:0031625	ubiquitin protein ligase binding	55/1772	309/17548	2.15738e-05	0.00248338	0.00221793	3313/55294/3303/8405/25820/5187/79139/7251/5898/3305/6118/23197/118424/5567/3311/7332/9063/64112/11124/55432/10869/9530/51701/5094/56254/4092/7520/3091/4738/79899/8453/7336/5970/23710/9641/7326/54472/23586/7466/84959/3304/7917/672/387521/53339/57763/596/7328/54737/29089/9618/80196/8451/11200/389161	55
turquoise	GO:0001076	transcription factor activity, RNA polymerase II transcription factor binding	38/1772	191/17548	3.39311e-05	0.00351526	0.00313952	6095/9975/3303/6837/406/10432/4928/25942/4848/9969/10001/4779/10062/1660/400569/9441/1386/79960/3091/3068/6597/51741/5932/10915/6621/6873/988/6595/4602/473/672/6908/1385/7376/7403/4089/5465/4853	38
turquoise	GO:0044183	protein binding involved in protein folding	14/1772	42/17548	3.76131e-05	0.00354247	0.00316382	8195/3313/3303/3305/10693/3311/51182/6782/79443/3304/5201/972/22948/7203	14
turquoise	GO:0016779	nucleotidyltransferase activity	30/1772	142/17548	7.02306e-05	0.00606324	0.00541515	5437/5435/11164/10914/55718/23318/64282/84265/2592/51728/81488/54840/51455/54855/9097/5557/57804/55907/5439/7014/64802/51601/5431/23649/5558/171568/11044/11232/5441/201973	30
turquoise	GO:0008276	protein methyltransferase activity	22/1772	91/17548	7.96816e-05	0.00635001	0.00567127	5110/84661/9070/2146/58508/83852/84193/84444/23463/55904/55471/51504/9869/10419/3275/8726/79084/7799/79609/10196/90826/79091	22
turquoise	GO:0061659	ubiquitin-like protein ligase activity	42/1772	229/17548	9.74783e-05	0.00721339	0.00644236	91694/25820/5987/118424/54941/9690/153830/6500/9063/130507/6047/7337/57154/51366/6477/400569/5930/6502/152006/8453/7336/26272/25831/26091/115426/26046/7326/51529/25897/5828/83737/90850/387521/387921/7328/89910/79872/29089/80196/9616/8451/57520	42
turquoise	GO:0061630	ubiquitin protein ligase activity	41/1772	224/17548	0.0001228	0.00822448	0.00734537	91694/25820/5987/118424/54941/9690/153830/6500/130507/6047/7337/57154/51366/6477/400569/5930/6502/152006/8453/7336/26272/25831/26091/115426/26046/7326/51529/25897/5828/83737/90850/387521/387921/7328/89910/79872/29089/80196/9616/8451/57520	41
turquoise	GO:0003899	DNA-directed 5'-3' RNA polymerase activity	13/1772	41/17548	0.000127019	0.00822448	0.00734537	5437/5435/55718/84265/51728/81488/5557/5439/5431/5558/171568/5441/201973	13
turquoise	GO:0001047	core promoter binding	29/1772	142/17548	0.00017211	0.00935001	0.0083506	8204/6095/9975/27316/2005/7709/406/1106/2146/170506/5971/1660/4520/4208/6597/7150/2959/284058/3428/11179/30812/10419/6908/3665/7071/55818/5451/55269/23528	29
turquoise	GO:0042623	ATPase activity, coupled	61/1772	380/17548	0.000177299	0.00935001	0.0083506	79665/3313/6832/3303/1022/57062/1106/10928/3305/170506/7486/4905/57198/1659/10126/51382/5701/8607/3311/8449/488/1660/9879/51182/9188/60625/489/1108/2186/2968/7520/6782/6597/10146/2965/56919/5705/1656/6595/528/8458/10057/1781/3304/64848/50485/79039/10845/535/546/4621/1105/5190/8655/90423/84896/493/5700/10058/140735/902	61
turquoise	GO:0031072	heat shock protein binding	26/1772	122/17548	0.000179104	0.00935001	0.0083506	3313/9093/317/3303/406/3305/10049/3311/11124/10869/51182/9451/4597/6782/3091/79982/196/55898/2288/26278/3304/7917/1385/26973/57026/79091	26
turquoise	GO:0051787	misfolded protein binding	10/1772	27/17548	0.000180502	0.00935001	0.0083506	3313/3303/3305/3311/51182/1861/6782/3304/9695/7917	10
turquoise	GO:0008170	N-methyltransferase activity	22/1772	97/17548	0.00021629	0.0105237	0.00939883	84661/9070/2146/58508/83852/51093/84193/84444/55904/55471/51106/9869/10419/3275/81627/8726/79084/7799/79609/10196/90826/79091	22
turquoise	GO:0004386	helicase activity	30/1772	151/17548	0.000223476	0.0105237	0.00939883	79665/6832/57062/1106/170506/7486/1659/8607/8449/4172/1660/9879/9188/60625/1108/2968/7520/6597/10146/56919/1656/6595/23586/8458/64848/50485/79039/55636/546/1105	30
turquoise	GO:0008026	ATP-dependent helicase activity	22/1772	98/17548	0.00025272	0.0105532	0.00942518	79665/6832/57062/1106/170506/7486/1659/8607/8449/1660/9879/9188/60625/1108/2968/7520/10146/56919/1656/64848/79039/1105	22
turquoise	GO:0070035	purine NTP-dependent helicase activity	22/1772	98/17548	0.00025272	0.0105532	0.00942518	79665/6832/57062/1106/170506/7486/1659/8607/8449/1660/9879/9188/60625/1108/2968/7520/10146/56919/1656/64848/79039/1105	22
turquoise	GO:0001103	RNA polymerase II repressing transcription factor binding	11/1772	33/17548	0.000254662	0.0105532	0.00942518	8195/25942/1108/5932/10915/3516/6908/55212/5465/65992/582	11
turquoise	GO:0034062	5'-3' RNA polymerase activity	13/1772	44/17548	0.000280544	0.0107646	0.00961397	5437/5435/55718/84265/51728/81488/5557/5439/5431/5558/171568/5441/201973	13
turquoise	GO:0097747	RNA polymerase activity	13/1772	44/17548	0.000280544	0.0107646	0.00961397	5437/5435/55718/84265/51728/81488/5557/5439/5431/5558/171568/5441/201973	13
turquoise	GO:0043021	ribonucleoprotein complex binding	25/1772	120/17548	0.00034135	0.01263	0.01128	9728/83939/80149/2146/2107/219402/22849/6629/1660/10421/253943/56919/6728/26046/6729/51068/8562/9147/10419/7917/83737/90850/5018/7374/8260	25
turquoise	GO:0003924	GTPase activity	49/1772	297/17548	0.000389804	0.0139254	0.0124369	10890/23560/2769/64225/5921/5898/402/9367/9567/55207/27314/51174/1915/57403/83452/5862/4735/3845/4893/116987/51184/378/6729/7283/10672/57799/83871/10325/375/399/55752/57826/55288/55647/54509/51762/9364/373/11020/55669/9545/22800/84705/84617/10966/25923/5908/326624/51560	49
turquoise	GO:0008353	RNA polymerase II carboxy-terminal domain kinase activity	7/1772	16/17548	0.000531545	0.0181141	0.0161779	1022/8621/2968/2965/8812/51755/902	7
turquoise	GO:0016273	arginine N-methyltransferase activity	6/1772	12/17548	0.00056733	0.0181141	0.0161779	55471/10419/3275/79084/10196/90826	6
turquoise	GO:0016274	protein-arginine N-methyltransferase activity	6/1772	12/17548	0.00056733	0.0181141	0.0161779	55471/10419/3275/79084/10196/90826	6
turquoise	GO:0008094	DNA-dependent ATPase activity	19/1772	84/17548	0.000588029	0.0181141	0.0161779	1022/1106/170506/7486/8607/1660/1108/2186/2968/7520/6597/10146/2965/6595/8458/50485/546/1105/902	19
turquoise	GO:0019003	GDP binding	15/1772	59/17548	0.000594478	0.0181141	0.0161779	10890/5898/9367/55207/57403/5862/3845/6729/57799/375/57826/51762/9364/373/5908	15
turquoise	GO:0042054	histone methyltransferase activity	15/1772	60/17548	0.000719715	0.0213036	0.0190265	84661/9070/2146/58508/83852/84193/84444/55904/9869/10419/3275/8726/7799/10196/90826	15
turquoise	GO:0001882	nucleoside binding	59/1772	385/17548	0.000753559	0.0216858	0.0193678	10890/23560/2769/64225/170575/5898/402/474344/9367/9567/30844/55207/27314/51174/1915/57403/221079/83452/5862/4735/3845/387751/131870/4893/116987/51184/378/6729/2288/7283/10672/57799/5431/83871/10325/5106/375/399/55752/57826/4860/26225/55288/55647/54509/51762/9364/373/11020/55669/9545/22800/84705/84617/10966/25923/5908/326624/51560	59
turquoise	GO:0032549	ribonucleoside binding	58/1772	378/17548	0.000805968	0.0225671	0.0201549	10890/23560/2769/64225/170575/5898/402/474344/9367/9567/30844/55207/27314/51174/1915/57403/221079/83452/5862/4735/3845/387751/131870/4893/116987/51184/378/6729/2288/7283/10672/57799/5431/83871/10325/5106/375/399/55752/57826/26225/55288/55647/54509/51762/9364/373/11020/55669/9545/22800/84705/84617/10966/25923/5908/326624/51560	58
turquoise	GO:0050681	androgen receptor binding	12/1772	43/17548	0.000843916	0.0228964	0.020449	8204/1022/9063/6047/10865/22938/6597/3275/672/55818/8202/55128	12
turquoise	GO:0005525	GTP binding	57/1772	371/17548	0.000861929	0.0228964	0.020449	10890/23560/2769/64225/170575/5898/402/474344/9367/9567/30844/55207/27314/51174/1915/57403/221079/83452/5862/4735/3845/387751/131870/4893/116987/51184/378/6729/2288/7283/10672/57799/83871/10325/5106/375/399/55752/57826/26225/55288/55647/54509/51762/9364/373/11020/55669/9545/22800/84705/84617/10966/25923/5908/326624/51560	57
turquoise	GO:0042393	histone binding	34/1772	194/17548	0.000994509	0.0257578	0.0230046	10765/1106/51147/29028/10600/23774/55723/2186/3014/56254/6597/84148/6830/144108/5252/55904/55689/23198/6944/84289/23378/115426/25988/6595/114825/546/9918/1105/4678/23476/54737/10771/165918/8019	34
turquoise	GO:0032550	purine ribonucleoside binding	57/1772	374/17548	0.00104753	0.0264693	0.02364	10890/23560/2769/64225/170575/5898/402/474344/9367/9567/30844/55207/27314/51174/1915/57403/221079/83452/5862/4735/3845/387751/131870/4893/116987/51184/378/6729/2288/7283/10672/57799/83871/10325/5106/375/399/55752/57826/26225/55288/55647/54509/51762/9364/373/11020/55669/9545/22800/84705/84617/10966/25923/5908/326624/51560	57
turquoise	GO:0035257	nuclear hormone receptor binding	28/1772	151/17548	0.00111156	0.0274186	0.0244878	8204/79447/1022/9611/8289/9969/9063/6047/10865/22938/3091/6597/2959/3159/5111/10025/2521/2288/79039/9325/3275/672/1488/7376/55818/8202/55128/6256	28
turquoise	GO:0001883	purine nucleoside binding	57/1772	377/17548	0.00126773	0.0296653	0.0264944	10890/23560/2769/64225/170575/5898/402/474344/9367/9567/30844/55207/27314/51174/1915/57403/221079/83452/5862/4735/3845/387751/131870/4893/116987/51184/378/6729/2288/7283/10672/57799/83871/10325/5106/375/399/55752/57826/26225/55288/55647/54509/51762/9364/373/11020/55669/9545/22800/84705/84617/10966/25923/5908/326624/51560	57
turquoise	GO:0140097	catalytic activity, acting on DNA	34/1772	197/17548	0.00130624	0.0296653	0.0264944	6832/92667/1106/7486/8607/1677/1660/64282/1108/2968/7520/54840/7150/5883/3159/5111/10146/5932/57804/3516/7014/50485/23649/5558/80198/7515/546/1105/7374/11232/4913/55218/2021/201973	34
turquoise	GO:0019783	ubiquitin-like protein-specific protease activity	25/1772	131/17548	0.00131428	0.0296653	0.0264944	84132/57599/10208/10617/54764/80149/10600/51138/55432/10869/84749/8314/205564/59343/219333/9097/91833/10713/54726/55325/55139/84196/93624/10987/79868	25
turquoise	GO:0016796	exonuclease activity, active with either ribo- or deoxyribonucleic acids and producing 5'-phosphomonoesters	13/1772	51/17548	0.00131718	0.0296653	0.0264944	51010/92667/4848/201626/56915/54840/5883/25996/114034/57472/255967/115752/55218	13
turquoise	GO:0000978	RNA polymerase II proximal promoter sequence-specific DNA binding	64/1772	436/17548	0.00142138	0.0313309	0.027982	2005/2313/7709/406/5187/2146/3298/10725/4791/2002/7181/7024/55657/7942/10062/430/4520/5977/1386/64412/1108/200014/2551/4097/339344/4208/3091/6597/196/3516/7050/5970/84969/26205/3428/25988/7182/1054/11179/2355/30818/4602/5993/9935/9603/4149/55636/6908/5991/8726/1385/7376/7071/7403/86/6498/4089/5465/57215/467/6256/1649/23528/3394	64
turquoise	GO:0001222	transcription corepressor binding	6/1772	14/17548	0.00154315	0.0333064	0.0297463	6095/5187/4848/3068/988/8864	6
turquoise	GO:0035035	histone acetyltransferase binding	9/1772	29/17548	0.00164364	0.0347513	0.0310368	11319/4520/3091/5111/284058/9325/1385/2034/55128	9
turquoise	GO:0004527	exonuclease activity	17/1772	78/17548	0.00172612	0.0355413	0.0317424	51010/92667/80149/7486/4848/201626/56915/54840/5883/25996/114034/57472/255967/57455/115752/55218/51692	17
turquoise	GO:0042974	retinoic acid receptor binding	8/1772	24/17548	0.00177849	0.0355413	0.0317424	8204/10865/22938/3159/2521/3275/1488/7376	8
turquoise	GO:0016780	phosphotransferase activity, for other substituted phosphate groups	7/1772	19/17548	0.00178393	0.0355413	0.0317424	54675/54872/5281/10423/1798/10390/142891	7
turquoise	GO:0016887	ATPase activity	66/1772	457/17548	0.00182904	0.0355549	0.0317545	79665/3313/6832/3303/1022/57062/1106/10928/3305/170506/29028/7486/4905/57198/23078/1659/10126/51382/5701/8607/3311/8449/488/1660/9879/51182/9188/60625/489/23/1108/2186/2968/1861/7520/6782/6597/10146/2965/56919/5705/1656/6595/528/8458/10057/1781/3304/64848/50485/79039/4292/10845/535/546/4621/1105/5190/8655/90423/84896/493/5700/10058/140735/902	66
turquoise	GO:0004532	exoribonuclease activity	10/1772	35/17548	0.00185325	0.0355549	0.0317545	51010/80149/4848/201626/56915/25996/114034/57472/255967/115752	10
turquoise	GO:0000987	proximal promoter sequence-specific DNA binding	65/1772	451/17548	0.00207369	0.0390608	0.0348856	2005/2313/7709/406/5187/2146/3298/10725/4791/2002/7181/7024/55657/7942/10062/430/4520/5977/9658/1386/64412/1108/200014/2551/4097/339344/4208/3091/6597/196/3516/7050/5970/84969/26205/3428/25988/7182/1054/11179/2355/30818/4602/5993/9935/9603/4149/55636/6908/5991/8726/1385/7376/7071/7403/86/6498/4089/5465/57215/467/6256/1649/23528/3394	65
turquoise	GO:0001056	RNA polymerase III activity	6/1772	15/17548	0.00235361	0.0426028	0.0380491	5437/5435/55718/51728/171568/5441	6
turquoise	GO:0051082	unfolded protein binding	23/1772	122/17548	0.00236725	0.0426028	0.0380491	8195/3313/9093/3303/3305/51103/10693/10049/22937/3311/51182/1861/6782/23386/79443/3304/10772/10845/7265/5201/22948/3998/7203	23
turquoise	GO:0004004	ATP-dependent RNA helicase activity	15/1772	67/17548	0.0023851	0.0426028	0.0380491	79665/6832/57062/170506/1659/8449/1660/9879/9188/60625/10146/56919/1656/64848/79039	15
turquoise	GO:0000175	3'-5'-exoribonuclease activity	9/1772	31/17548	0.00274952	0.0470718	0.0420403	51010/4848/201626/56915/25996/114034/57472/255967/115752	9
turquoise	GO:0003724	RNA helicase activity	15/1772	68/17548	0.0027801	0.0470718	0.0420403	79665/6832/57062/170506/1659/8449/1660/9879/9188/60625/10146/56919/1656/64848/79039	15
turquoise	GO:0008186	RNA-dependent ATPase activity	15/1772	68/17548	0.0027801	0.0470718	0.0420403	79665/6832/57062/170506/1659/8449/1660/9879/9188/60625/10146/56919/1656/64848/79039	15
turquoise	GO:0140030	modification-dependent protein binding	24/1772	131/17548	0.00285744	0.0470718	0.0420403	54764/51147/84875/5710/2186/6597/84148/5252/55904/55689/23198/84289/23378/9641/10318/7917/546/1105/23476/29979/54737/10771/165918/8019	24
turquoise	GO:0001055	RNA polymerase II activity	5/1772	11/17548	0.00286247	0.0470718	0.0420403	5437/5435/5439/5431/5441	5
turquoise	GO:0032561	guanyl ribonucleotide binding	57/1772	391/17548	0.00292706	0.0473818	0.0423172	10890/23560/2769/64225/170575/5898/402/474344/9367/9567/30844/55207/27314/51174/1915/57403/221079/83452/5862/4735/3845/387751/131870/4893/116987/51184/378/6729/2288/7283/10672/57799/83871/10325/5106/375/399/55752/57826/26225/55288/55647/54509/51762/9364/373/11020/55669/9545/22800/84705/84617/10966/25923/5908/326624/51560	57
turquoise	GO:0035258	steroid hormone receptor binding	18/1772	89/17548	0.0030851	0.0478915	0.0427725	8204/79447/1022/9063/6047/10865/22938/6597/5111/2521/2288/79039/9325/3275/672/55818/8202/55128	18
turquoise	GO:0001104	RNA polymerase II transcription cofactor activity	20/1772	103/17548	0.00309528	0.0478915	0.0427725	3303/6837/10432/4928/25942/4848/9969/10001/1660/400569/9441/79960/3068/6597/51741/5932/10915/6595/473/672	20
turquoise	GO:0019001	guanyl nucleotide binding	57/1772	392/17548	0.00309723	0.0478915	0.0427725	10890/23560/2769/64225/170575/5898/402/474344/9367/9567/30844/55207/27314/51174/1915/57403/221079/83452/5862/4735/3845/387751/131870/4893/116987/51184/378/6729/2288/7283/10672/57799/83871/10325/5106/375/399/55752/57826/26225/55288/55647/54509/51762/9364/373/11020/55669/9545/22800/84705/84617/10966/25923/5908/326624/51560	57

## Sheet: Execl Table S3
Excel Table S3. Enrichment of the target genes of known transcription factors in the four modules strongly correlated with PM exposure.
cyan
Transcription Factor	P.value	E.value	Q.value	FDR control (B-H)	Intersection	Target genes	Random Control(%)
NFKB1	0	0	0	0.001282	6	141	0
RELA	0	0	0	0.002564	5	84	0
JUN	1e-05	0.00039	3.939e-05	0.003846	5	131	2
NFIC	0.00014	0.00546	0.0004136	0.005128	3	45	0
CEBPB	0.00055	0.02145	0.0013	0.00641	3	71	0
REL	0.00127	0.04953	0.002144	0.007692	2	23	0
CEBPD	0.00127	0.04953	0.002144	0.008974	2	23	1
SP1	0.00232	0.09048	0.003427	0.01026	5	428	4
CTNNB1	0.0047	0.1833	0.006171	0.01154	4	306	2
CDX1	0.00702	0.2738	0.007892	0.01282	1	3	0
STAT1	0.0087	0.3393	0.007892	0.0141	2	61	0
DLX1	0.00935	0.3647	0.007892	0.01538	1	4	0
STAT6	0.00935	0.3647	0.007892	0.01667	1	4	0
RELB	0.00935	0.3647	0.007892	0.01795	1	4	0
STAT3	0.01104	0.4306	0.008619	0.01923	2	69	1
DLX2	0.01167	0.4551	0.008619	0.02051	1	5	0
CEBPG	0.01631	0.6361	0.01134	0.02179	1	7	0
BCL6	0.02322	0.9056	0.01444	0.02308	1	10	0
PDX1	0.02322	0.9056	0.01444	0.02436	1	10	0
TFAP2A	0.02897	1.13	0.01712	0.02564	2	115	1
STAT2	0.03691	1.439	0.02077	0.02692	1	16	0
GATA4	0.03917	1.528	0.02104	0.02821	1	17	0
JUNB	0.04593	1.791	0.0236	0.02949	1	20	1
GATA1	0.05932	2.313	0.02921	0.03077	1	26	0
JUND	0.06375	2.486	0.03013	0.03205	1	28	0
CREB1	0.08598	3.353	0.03908	0.03333	2	211	3
YY1	0.1027	4.005	0.04494	0.03462	1	46	0
FOS	0.1069	4.17	0.04512	0.0359	1	48	1
LEF1	0.1153	4.498	0.04699	0.03718	1	52	1
brown
Transcription Factor	P.value	E.value	Q.value	FDR control (B-H)	Intersection	Target genes	Random Control(%)
MYC	0	0	0	0.001471	15	553	41.4
SP1	0.0019	0.0646	0.009474	0.002941	9	428	17.4
TP53	0.00301	0.1023	0.01001	0.004412	5	148	3.6
STAT1	0.00786	0.2672	0.01628	0.005882	3	61	1.6
CEBPA	0.00816	0.2774	0.01628	0.007353	4	119	5
STAT3	0.01102	0.3747	0.01832	0.008824	3	69	2.2
HOXD3	0.02009	0.6831	0.02862	0.01029	1	3	0
blue
Transcription Factor	P.value	E.value	Q.value	FDR control (B-H)	Intersection	Target genes	Random Control(%)
MYC	0	0	0	0.0008621	19	553	53.4
TFAP2A	0.0001	0.0058	0.0004628	0.001724	7	115	4.6
SP1	0.00061	0.03538	0.001882	0.002586	12	428	33
ETS1	0.00177	0.1027	0.003388	0.003448	6	136	4.6
SPI1	0.00183	0.1061	0.003388	0.00431	5	93	3.2
GLI2	0.00338	0.196	0.004655	0.005172	5	107	4.2
USF1	0.00352	0.2042	0.004655	0.006034	5	108	5
SP2	0.00555	0.3219	0.006421	0.006897	2	12	0
RELA	0.00819	0.475	0.00759	0.007759	4	84	1.8
SP3	0.0082	0.4756	0.00759	0.008621	5	132	3.6
ELK1	0.00984	0.5707	0.00828	0.009483	2	16	1.2
POU2F2	0.0152	0.8816	0.01172	0.01034	2	20	0.4
REL	0.01988	1.153	0.01415	0.01121	2	23	0
STAT3	0.02768	1.605	0.0183	0.01207	3	69	2.4
POU1F1	0.03313	1.922	0.01946	0.01293	3	74	4.6
ETV4	0.0348	2.018	0.01946	0.01379	2	31	0.4
RELB	0.03757	2.179	0.01946	0.01466	1	4	0.2
FOXO3	0.03785	2.195	0.01946	0.01552	3	78	5.2
NFKB1	0.04488	2.603	0.02186	0.01638	4	141	5.6
USF2	0.04829	2.801	0.02235	0.01724	3	86	0.6
RUNX1	0.05584	3.239	0.02461	0.0181	1	6	0.2
FOXO1	0.06676	3.872	0.02687	0.01897	4	161	9.4
E2F1	0.06676	3.872	0.02687	0.01983	4	161	9.2
CTNNB1	0.0701	4.066	0.02704	0.02069	6	306	19.4
MYB	0.08259	4.79	0.0294	0.02155	1	9	0.2
E2F6	0.08259	4.79	0.0294	0.02241	1	9	0
MYBL2	0.1	5.801	0.03429	0.02328	1	11	0.6
RARA	0.1113	6.458	0.03639	0.02414	2	60	1.8
GLI1	0.114	6.612	0.03639	0.025	3	124	3.8
PPARD	0.1255	7.281	0.0384	0.02586	1	14	0
JUN	0.1286	7.459	0.0384	0.02672	3	131	4.2
RARG	0.1421	8.245	0.04112	0.02759	1	16	0.2
PAX6	0.1503	8.72	0.04217	0.02845	1	17	0.8
NFYA	0.1585	9.191	0.04314	0.02931	1	18	0.6
TP53	0.1666	9.663	0.04406	0.03017	3	148	7.6
turquoise
Transcription Factor	P.value	E.value	Q.value	FDR control (B-H)	Intersection	Target genes	Random Control(%)
CREB1	0	0	0	0.0004673	21	211	44.9
RBPJ	0	0	0	0.0009346	14	104	17.7
SP1	0	0	0	0.001402	33	428	94
MYC	0	0	0	0.001869	71	553	97.9
ATF1	1e-05	0.00107	1.498e-05	0.002336	10	59	8.8
CREBBP	1e-05	0.00107	1.498e-05	0.002804	4	6	0.1
SPI1	2e-05	0.00214	2.248e-05	0.003271	12	93	19.1
NFKB1	2e-05	0.00214	2.248e-05	0.003738	15	141	29.3
RELA	4e-05	0.00428	3.996e-05	0.004206	11	84	10.6
SREBF2	7e-05	0.00749	6.293e-05	0.004673	7	35	1.7
SREBF1	0.00013	0.01391	0.0001049	0.00514	8	51	4.2
TP53	0.00014	0.01498	0.0001049	0.005607	14	148	26.8
ETV4	0.00028	0.02996	0.0001936	0.006075	6	31	2.7
E2F1	0.00034	0.03638	0.0002183	0.006542	14	161	37.1
EGR1	0.00039	0.04173	0.0002337	0.007009	10	91	16.9
FOXO1	0.00111	0.1188	0.0006082	0.007477	13	161	36.9
NOTCH1	0.00115	0.123	0.0006082	0.007944	6	40	2.6
TFAP2A	0.00238	0.2547	0.00114	0.008411	10	115	18
YY1	0.00241	0.2579	0.00114	0.008879	6	46	7
BRCA1	0.00278	0.2975	0.00125	0.009346	3	10	0.6
BCL3	0.00523	0.5596	0.002239	0.009813	2	4	0.3
ETS1	0.00787	0.8421	0.003216	0.01028	10	136	23.9
TCF7L2	0.00982	1.051	0.003838	0.01075	6	61	8.9
USF2	0.0148	1.584	0.005544	0.01121	7	86	12.3
ATF6	0.01724	1.845	0.005794	0.01168	2	7	0.1
JUN	0.01729	1.85	0.005794	0.01215	9	131	19.9
STAT3	0.0174	1.862	0.005794	0.01262	6	69	6.8
ESR1	0.02281	2.441	0.007324	0.01308	5	54	5.7
CREM	0.02416	2.585	0.00749	0.01355	3	21	1.9
PPARA	0.02737	2.929	0.007937	0.01402	3	22	3.8
SMAD1	0.02737	2.929	0.007937	0.01449	3	22	3.3
E2F6	0.0284	3.039	0.007979	0.01495	2	9	0.2
FOXO3	0.02989	3.198	0.008143	0.01542	6	78	9.4
PPARG	0.0342	3.659	0.009043	0.01589	4	41	3.2
WT1	0.04659	4.985	0.01197	0.01636	3	27	1.8
NFATC2	0.04907	5.25	0.01225	0.01682	2	12	0.8
FLI1	0.05106	5.463	0.01241	0.01729	3	28	1.6
RFX1	0.05948	6.364	0.01304	0.01776	1	2	0
EGR4	0.05948	6.364	0.01304	0.01822	1	2	0
OLIG1	0.05948	6.364	0.01304	0.01869	1	2	0
FOXP1	0.05948	6.364	0.01304	0.01916	1	2	0
CEBPB	0.0626	6.698	0.0134	0.01963	5	71	9.1
PPARD	0.06505	6.96	0.0136	0.02009	2	14	0.5
CTNNB1	0.07855	8.405	0.01605	0.02056	14	306	76
ELK1	0.0825	8.828	0.01633	0.02103	2	16	0.5
STAT5B	0.08358	8.943	0.01633	0.0215	4	55	4.4
IRF9	0.08788	9.403	0.01648	0.02196	1	3	0.1
STAT5A	0.08799	9.415	0.01648	0.02243	4	56	4.6
ATF2	0.09974	10.67	0.01819	0.0229	3	37	3.5
NFYA	0.1012	10.83	0.01819	0.02336	2	18	2
GLI2	0.1041	11.14	0.01821	0.02383	6	107	18.1
AR	0.1067	11.42	0.01821	0.0243	4	60	8.3
USF1	0.1076	11.52	0.01821	0.02477	6	108	20
STAT1	0.1117	11.95	0.01821	0.02523	4	61	10.4
RELB	0.1154	12.35	0.01821	0.0257	1	4	0.2
ID1	0.1154	12.35	0.01821	0.02617	1	4	0.1
MYBL1	0.1154	12.35	0.01821	0.02664	1	4	0.1
POU2F2	0.1209	12.94	0.01857	0.0271	2	20	1.5
SMAD3	0.1218	13.04	0.01857	0.02757	4	63	4.7
SMAD2	0.1311	14.03	0.01964	0.02804	2	21	2.3
E2F4	0.1394	14.92	0.02028	0.0285	3	43	5.9
ERG	0.1421	15.21	0.02028	0.02897	1	5	1
FOXH1	0.1421	15.21	0.02028	0.02944	1	5	0.2
CEBPA	0.1502	16.07	0.02093	0.02991	6	119	20.1
REL	0.152	16.26	0.02093	0.03037	2	23	0.6
NFIC	0.1537	16.44	0.02093	0.03084	3	45	5.7
ARNT	0.1681	17.98	0.02222	0.03131	1	6	0
FEV	0.1681	17.98	0.02222	0.03178	1	6	0.1
POU1F1	0.1842	19.71	0.024	0.03224	4	74	12.1
SP3	0.2085	22.31	0.02678	0.03271	6	132	22.6
HOXA5	0.2176	23.28	0.02717	0.03318	1	8	0.2
CEBPE	0.2176	23.28	0.02717	0.03364	1	8	0.1
RARB	0.2402	25.7	0.02892	0.03411	2	31	3.8
FOXO4	0.2412	25.81	0.02892	0.03458	1	9	0.3
MYB	0.2412	25.81	0.02892	0.03505	1	9	0.6
NFIA	0.2628	28.12	0.03045	0.03551	2	33	3.7
NFATC1	0.2642	28.27	0.03045	0.03598	1	10	0.3
SOX10	0.2642	28.27	0.03045	0.03645	1	10	0.5
RARA	0.2714	29.04	0.03089	0.03692	3	60	8.8
NR2F2	0.3289	35.2	0.03667	0.03738	1	13	0.2
MITF	0.3303	35.35	0.03667	0.03785	2	39	2
GABPA	0.3492	37.37	0.03829	0.03832	1	14	0.1
HBP1	0.388	41.52	0.04016	0.03879	1	16	0.7
RARG	0.388	41.52	0.04016	0.03925	1	16	0.9
STAT2	0.388	41.52	0.04016	0.03972	1	16	0.5
SMAD4	0.3961	42.38	0.04016	0.04019	2	45	5.1
HIF1A	0.3961	42.38	0.04016	0.04065	2	45	4.5
NR1H2	0.4065	43.5	0.04016	0.04112	1	17	0.9
NR1H3	0.4065	43.5	0.04016	0.04159	1	17	0.9
TCF7	0.4065	43.5	0.04016	0.04206	1	17	0.8
RUNX2	0.4065	43.5	0.04016	0.04252	1	17	1
ATF4	0.4245	45.42	0.04148	0.04299	1	18	1
NFE2L2	0.4419	47.29	0.04252	0.04346	1	19	0.8
TBP	0.4486	48	0.04252	0.04393	2	50	4
HNF4A	0.4525	48.42	0.04252	0.04439	3	82	10.6
JUNB	0.4588	49.09	0.04252	0.04486	1	20	1.4
NR2F1	0.4588	49.09	0.04252	0.04533	1	20	1.6
CEBPD	0.5065	54.2	0.04647	0.04579	1	23	0.7
GLI1	0.5187	55.5	0.0471	0.04626	4	124	25.6
GATA1	0.55	58.85	0.04945	0.04673	1	26	1.2

## Sheet: Execl Table S4
Excel Table S4. Enrichment of the binding motifs of known transcription factors in the poised cis-regulatory regions of the genes of the four modules strongly correlated with PM exposure.
cyan_up
Transcription factors（cell lines, relevant chipseq dataset）	DNA motif	P-value	Log P-value	q-value (Benjamini)	Target Sequences with Motif	Target Sequences with Motif	Background Sequences with Motif	Background Sequences with Motif
Nrf2(bZIP)/Lymphoblast-Nrf2-ChIP-Seq(GSE37589)/Homer	HTGCTGAGTCAT	0.001	-9.026	0.0174	8	0.0338	444.2	0.0061
NFkB-p65(RHD)/GM12787-p65-ChIP-Seq(GSE19485)/Homer	WGGGGATTTCCC	0.001	-8.63	0.0174	38	0.1603	6331.3	0.0868
n-Myc(bHLH)/mES-nMyc-ChIP-Seq(GSE11431)/Homer	VRCCACGTGG	0.001	-7.26	0.034	39	0.1646	7037.9	0.0965
PIF4(bHLH)/Seedling-PIF4-ChIP-Seq(GSE35315)/Homer	NNBCACGTGN	0.01	-6.736	0.0418	54	0.2278	11039.6	0.1513
RAR:RXR(NR),DR5/ES-RAR-ChIP-Seq(GSE56893)/Homer	RGGTCADNNAGAGGTCAV	0.01	-6.562	0.0456	6	0.0253	368.6	0.0051
bZIP:IRF(bZIP,IRF)/Th17-BatF-ChIP-Seq(GSE39756)/Homer	NAGTTTCABTHTGACTNW	0.01	-6.091	0.0534	21	0.0886	3241.4	0.0444
blue_up
Transcription factors（cell lines, relevant chipseq dataset）	DNA motif	P-value	Log P-value	q-value (Benjamini)	Target Sequences with Motif	Target Sequences with Motif	Background Sequences with Motif	Background Sequences with Motif
FOXP1(Forkhead)/H9-FOXP1-ChIP-Seq(GSE31006)/Homer	NYYTGTTTACHN	0.0001	-9.797	0.0215	90	0.0738	3493.9	0.0481
Fli1(ETS)/CD8-FLI-ChIP-Seq(GSE20898)/Homer	NRYTTCCGGH	0.0001	-9.704	0.0215	280	0.2295	13462.7	0.1853
GABPA(ETS)/Jurkat-GABPa-ChIP-Seq(GSE17954)/Homer	RACCGGAAGT	0.001	-7.501	0.0357	223	0.1828	10778	0.1483
GATA3(Zf)/iTreg-Gata3-ChIP-Seq(GSE20898)/Homer	AGATAASR	0.01	-6.018	0.0673	246	0.2016	12378.6	0.1703
RUNX-AML(Runt)/CD4+-PolII-ChIP-Seq(Barski_et_al.)/Homer	GCTGTGGTTW	0.01	-5.79	0.0776	131	0.1074	6136.1	0.0844
E2A(bHLH),near_PU.1/Bcell-PU.1-ChIP-Seq(GSE21512)/Homer	NVCACCTGBN	0.01	-5.788	0.0776	291	0.2385	14962.9	0.2059
ox2(HMG)/mES-Sox2-ChIP-Seq(GSE11431)/Homer	BCCATTGTTC	0.01	-5.744	0.0776	149	0.1221	7112	0.0979
ETS1(ETS)/Jurkat-ETS1-ChIP-Seq(GSE17954)/Homer	ACAGGAAGTG	0.01	-5.711	0.0776	239	0.1959	12064.5	0.166
Eomes(T-box)/H9-Eomes-ChIP-Seq(GSE26097)/Homer	ATTAACACCT	0.01	-5.387	0.0843	353	0.2893	18605	0.256
brown_up
Transcription factors（cell lines, relevant chipseq dataset）	DNA motif	P-value	Log P-value	q-value (Benjamini)	Target Sequences with Motif	Target Sequences with Motif	Background Sequences with Motif	Background Sequences with Motif
HOXA2(Homeobox)/mES-Hoxa2-ChIP-Seq(Donaldson_et_al.)/Homer	GYCATCMATCAT	0.001	-9.157	0.0408	26	0.026	797	0.0113
Hoxb4(Homeobox)/ES-Hoxb4-ChIP-Seq(GSE34014)/Homer	TGATTRATGGCY	0.001	-8.291	0.0408	38	0.038	1439.8	0.0204
STAT4(Stat)/CD4-Stat4-ChIP-Seq(GSE22104)/Homer	NYTTCCWGGAAR	0.001	-7.434	0.0408	151	0.1512	8244.1	0.1166
Pax7(Paired,Homeobox),longest/Myoblast-Pax7-ChIP-Seq(GSE25064)/Homer	NTAATTDGCYAATTANNWWD	0.01	-6.709	0.0525	10	0.01	216.9	0.0031
E2A(bHLH),near_PU.1/Bcell-PU.1-ChIP-Seq(GSE21512)/Homer	NVCACCTGBN	0.01	-6.3	0.0711	205	0.2052	11984.9	0.1695
Stat3(Stat)/mES-Stat3-ChIP-Seq(GSE11431)/Homer	CTTCCGGGAA	0.01	-5.801	0.0901	88	0.0881	4614.3	0.0652
STAT6(Stat)/Macrophage-Stat6-ChIP-Seq(GSE38377)/Homer	TTCCKNAGAA	0.01	-5.724	0.0903	89	0.0891	4689.5	0.0663
turquoise_up.motif
Transcription factors（cell lines, relevant chipseq dataset）	DNA motif	P-value	Log P-value	q-value (Benjamini)	Target Sequences with Motif	Target Sequences with Motif	Background Sequences with Motif	Background Sequences with Motif
Fli1(ETS)/CD8-FLI-ChIP-Seq(GSE20898)/Homer	NRYTTCCGGH	1e-07	-16.29	0	1070	0.2234	13142.1	0.193
ETS1(ETS)/Jurkat-ETS1-ChIP-Seq(GSE17954)/Homer	ACAGGAAGTG	1e-07	-16.22	0	954	0.1992	11591.6	0.1702
ELF1(ETS)/Jurkat-ELF1-ChIP-Seq(SRA014231)/Homer	AVCCGGAAGT	1e-05	-13.05	0.0001	605	0.1263	7172.5	0.1053
Etv2(ETS)/ES-ER71-ChIP-Seq(GSE59402)/Homer(0.967)	NNAYTTCCTGHN	1e-05	-12.36	0.0002	815	0.1702	10003	0.1469
EABPA(ETS)/Jurkat-GABPa-ChIP-Seq(GSE17954)/Homer	RACCGGAAGT	0.0001	-9.653	0.0028	836	0.1746	10501	0.1542
Ets1-distal(ETS)/CD4+-PolII-ChIP-Seq(Barski_et_al.)/Homer	MACAGGAAGT	0.0001	-9.307	0.0035	261	0.0545	2930.9	0.043
ETS:RUNX(ETS,Runt)/Jurkat-RUNX1-ChIP-Seq(GSE17954)/Homer	RCAGGATGTGGT	0.001	-7.826	0.0119	115	0.024	1176.4	0.0173
